# Supplementary material for: Molecular typing and epidemiology profiles of human adenovirus infection among hospitalized patients with severe acute respiratory infection in Huzhou, China
Source: PubMed Central journal article supplement (PMC9022850; doi:10.1371/journal.pone.0265987), 2022-04-21

# PLOS ONE

## Molecular Typing and Epidemiology Profiles of Human Adenovirus Infection among Hospitalized Patients with Severe Acute Respiratory Infection in Huzhou, China --Manuscript Draft--

|                                                                                      |                                                                                                                                                                                                                                                                                                                                                                                                                                                                                                                                                                                                                                                                                                                                                                                                                                                                                                                                                                                                                                                                                                                                                                                                                                                                                                                                                                                                                                                                                                                                                                                                                                                                                                                                                                                                                                                                                                                                                                                                                                                                                                                                                                                                                                                                                                                                                                                                                                       |
|--------------------------------------------------------------------------------------|---------------------------------------------------------------------------------------------------------------------------------------------------------------------------------------------------------------------------------------------------------------------------------------------------------------------------------------------------------------------------------------------------------------------------------------------------------------------------------------------------------------------------------------------------------------------------------------------------------------------------------------------------------------------------------------------------------------------------------------------------------------------------------------------------------------------------------------------------------------------------------------------------------------------------------------------------------------------------------------------------------------------------------------------------------------------------------------------------------------------------------------------------------------------------------------------------------------------------------------------------------------------------------------------------------------------------------------------------------------------------------------------------------------------------------------------------------------------------------------------------------------------------------------------------------------------------------------------------------------------------------------------------------------------------------------------------------------------------------------------------------------------------------------------------------------------------------------------------------------------------------------------------------------------------------------------------------------------------------------------------------------------------------------------------------------------------------------------------------------------------------------------------------------------------------------------------------------------------------------------------------------------------------------------------------------------------------------------------------------------------------------------------------------------------------------|
| <b>Manuscript Number:</b>                                                            | PONE-D-21-05692                                                                                                                                                                                                                                                                                                                                                                                                                                                                                                                                                                                                                                                                                                                                                                                                                                                                                                                                                                                                                                                                                                                                                                                                                                                                                                                                                                                                                                                                                                                                                                                                                                                                                                                                                                                                                                                                                                                                                                                                                                                                                                                                                                                                                                                                                                                                                                                                                       |
| <b>Article Type:</b>                                                                 | Research Article                                                                                                                                                                                                                                                                                                                                                                                                                                                                                                                                                                                                                                                                                                                                                                                                                                                                                                                                                                                                                                                                                                                                                                                                                                                                                                                                                                                                                                                                                                                                                                                                                                                                                                                                                                                                                                                                                                                                                                                                                                                                                                                                                                                                                                                                                                                                                                                                                      |
| <b>Full Title:</b>                                                                   | Molecular Typing and Epidemiology Profiles of Human Adenovirus Infection among Hospitalized Patients with Severe Acute Respiratory Infection in Huzhou, China                                                                                                                                                                                                                                                                                                                                                                                                                                                                                                                                                                                                                                                                                                                                                                                                                                                                                                                                                                                                                                                                                                                                                                                                                                                                                                                                                                                                                                                                                                                                                                                                                                                                                                                                                                                                                                                                                                                                                                                                                                                                                                                                                                                                                                                                         |
| <b>Short Title:</b>                                                                  | Human Adenovirus Infection in Hospitalized Patients in China                                                                                                                                                                                                                                                                                                                                                                                                                                                                                                                                                                                                                                                                                                                                                                                                                                                                                                                                                                                                                                                                                                                                                                                                                                                                                                                                                                                                                                                                                                                                                                                                                                                                                                                                                                                                                                                                                                                                                                                                                                                                                                                                                                                                                                                                                                                                                                          |
| <b>Corresponding Author:</b>                                                         | Lei Ji<br>Huzhou Center for Disease Control and Prevention<br>Huzhou, CHINA                                                                                                                                                                                                                                                                                                                                                                                                                                                                                                                                                                                                                                                                                                                                                                                                                                                                                                                                                                                                                                                                                                                                                                                                                                                                                                                                                                                                                                                                                                                                                                                                                                                                                                                                                                                                                                                                                                                                                                                                                                                                                                                                                                                                                                                                                                                                                           |
| <b>Keywords:</b>                                                                     | Human adenovirus; Respiratory tract infection; Epidemiology                                                                                                                                                                                                                                                                                                                                                                                                                                                                                                                                                                                                                                                                                                                                                                                                                                                                                                                                                                                                                                                                                                                                                                                                                                                                                                                                                                                                                                                                                                                                                                                                                                                                                                                                                                                                                                                                                                                                                                                                                                                                                                                                                                                                                                                                                                                                                                           |
| <b>Abstract:</b>                                                                     | <p><b>Background:</b> Severe acute respiratory infections (SARI) threaten human health and cause a large number of hospitalized patients every year. However, as one of the most common pathogen that cause acute respiratory tract infection, the molecular epidemiological information relating to HAdV among patients with SARI is limited. Here, we evaluate the epidemiological and molecular characteristics of HAdV infections among hospitalized patients with SARI from January 2017 to December 2019 in Huzhou, China.</p> <p><b>Methods:</b> From January 2017 to December 2019, a total of 657 nasopharyngeal swabs collected from inpatients with SARI were screened for HAdV and other common respiratory viruses by multiplex real-time PCR. All samples that tested positive for HAdV were further typed by sequencing partial sequences of hexon gene. Genotypes of HAdV were confirmed by phylogenetic analysis. Epidemiological data were analyzed using Microsoft Excel 2010 and service solutions (SPSS) 21.0 software.</p> <p><b>Results:</b> 251 (38.20%) samples were positive for at least one respiratory virus. HAdV was the second common viral pathogen detected, with a detection rate of 7.08%. Infection with HAdV was found in all age groups tested (0 ~, 2 ~, 5 ~, 15 ~, 50 ~, 65 ~). Children under 15 years old accounted for 84.62% (44/52) of the infections. Higher activity of HAdV infection could be seen in spring-early autumn season. 7 different types of HAdV belonging to 4 species (HAdV-A, B, C, E) were identified in hospitalized SARI cases, with HAdV-B3 as the most prevalent HAdV types, followed by HAdV-B7 and HAdV-E4. HAdV-B3 was the most frequently detected genotype in 2017 and 2019, accounting for 75.00% (9/12) and 63.64(7/11) of typed HAdV infections in 2017 and 2019 respectively. No predominant strain was responsible for HAdV infections in 2018, although HAdV-B7 (28.57%, 2/7) and HAdV-C1 (28.57%, 2/7) were the major causative genotypes.</p> <p><b>Conclusions:</b> This study revealed the prevalence and the molecular epidemiological characteristics of HAdV infections among hospitalized patients with SARI in Huzhou from January 2017 to December 2019. The HAdV prevalence is related to age and season. As the most prevalent HAdV types, HAdV-B3 was co-circulating with other types and presented an alternate prevalence pattern.</p> |
| <b>Order of Authors:</b>                                                             | Deshun Xu<br>Liping Chen<br>Xiaofang Wu<br>Lei Ji                                                                                                                                                                                                                                                                                                                                                                                                                                                                                                                                                                                                                                                                                                                                                                                                                                                                                                                                                                                                                                                                                                                                                                                                                                                                                                                                                                                                                                                                                                                                                                                                                                                                                                                                                                                                                                                                                                                                                                                                                                                                                                                                                                                                                                                                                                                                                                                     |
| <b>Additional Information:</b>                                                       |                                                                                                                                                                                                                                                                                                                                                                                                                                                                                                                                                                                                                                                                                                                                                                                                                                                                                                                                                                                                                                                                                                                                                                                                                                                                                                                                                                                                                                                                                                                                                                                                                                                                                                                                                                                                                                                                                                                                                                                                                                                                                                                                                                                                                                                                                                                                                                                                                                       |
| <b>Question</b>                                                                      | <b>Response</b>                                                                                                                                                                                                                                                                                                                                                                                                                                                                                                                                                                                                                                                                                                                                                                                                                                                                                                                                                                                                                                                                                                                                                                                                                                                                                                                                                                                                                                                                                                                                                                                                                                                                                                                                                                                                                                                                                                                                                                                                                                                                                                                                                                                                                                                                                                                                                                                                                       |
| <b>Financial Disclosure</b>                                                          | The author(s) received no specific funding for this work                                                                                                                                                                                                                                                                                                                                                                                                                                                                                                                                                                                                                                                                                                                                                                                                                                                                                                                                                                                                                                                                                                                                                                                                                                                                                                                                                                                                                                                                                                                                                                                                                                                                                                                                                                                                                                                                                                                                                                                                                                                                                                                                                                                                                                                                                                                                                                              |
| Enter a financial disclosure statement that describes the sources of funding for the |                                                                                                                                                                                                                                                                                                                                                                                                                                                                                                                                                                                                                                                                                                                                                                                                                                                                                                                                                                                                                                                                                                                                                                                                                                                                                                                                                                                                                                                                                                                                                                                                                                                                                                                                                                                                                                                                                                                                                                                                                                                                                                                                                                                                                                                                                                                                                                                                                                       |

work included in this submission. Review the [submission guidelines](#) for detailed requirements. View published research articles from [PLOS ONE](#) for specific examples.

This statement is required for submission and **will appear in the published article** if the submission is accepted. Please make sure it is accurate.

#### Unfunded studies

Enter: *The author(s) received no specific funding for this work.*

#### Funded studies

Enter a statement with the following details:

- Initials of the authors who received each award
- Grant numbers awarded to each author
- The full name of each funder
- URL of each funder website
- Did the sponsors or funders play any role in the study design, data collection and analysis, decision to publish, or preparation of the manuscript?
- **NO** - Include this sentence at the end of your statement: *The funders had no role in study design, data collection and analysis, decision to publish, or preparation of the manuscript.*
- **YES** - Specify the role(s) played.

\* typeset

#### Competing Interests

Use the instructions below to enter a competing interest statement for this submission. On behalf of all authors, disclose any [competing interests](#) that could be perceived to bias this work—acknowledging all financial support and any other relevant financial or non-financial competing interests.

This statement is **required** for submission and **will appear in the published article** if the submission is accepted. Please make sure it is accurate and that any funding sources listed in your Funding Information

The authors have declared that no competing interests exist

later in the submission form are also declared in your Financial Disclosure statement.

View published research articles from [PLOS ONE](#) for specific examples.

**NO authors have competing interests**

Enter: *The authors have declared that no competing interests exist.*

**Authors with competing interests**

Enter competing interest details beginning with this statement:

*I have read the journal's policy and the authors of this manuscript have the following competing interests: [insert competing interests here]*

\* typeset

**Ethics Statement**

Enter an ethics statement for this submission. This statement is required if the study involved:

- Human participants
- Human specimens or tissue
- Vertebrate animals or cephalopods
- Vertebrate embryos or tissues
- Field research

Write "N/A" if the submission does not require an ethics statement.

General guidance is provided below. Consult the [submission guidelines](#) for detailed instructions. **Make sure that all information entered here is included in the Methods section of the manuscript.**

This study was part of the national SARI surveillance program and was approved by the human research ethics committee of Huzhou Center for Disease Control and Prevention. The only human materials used were nasopharyngeal swabs collected from patients for routine detection. Oral informed consents were obtained from each participant.

**Format for specific study types**

**Human Subject Research (involving human participants and/or tissue)**

- Give the name of the institutional review board or ethics committee that approved the study
- Include the approval number and/or a statement indicating approval of this research
- Indicate the form of consent obtained (written/oral) or the reason that consent was not obtained (e.g. the data were analyzed anonymously)

**Animal Research (involving vertebrate animals, embryos or tissues)**

- Provide the name of the Institutional Animal Care and Use Committee (IACUC) or other relevant ethics board that reviewed the study protocol, and indicate whether they approved this research or granted a formal waiver of ethical approval
- Include an approval number if one was obtained
- If the study involved *non-human primates*, add *additional details* about animal welfare and steps taken to ameliorate suffering
- If anesthesia, euthanasia, or any kind of animal sacrifice is part of the study, include briefly which substances and/or methods were applied

**Field Research**

Include the following details if this study involves the collection of plant, animal, or other materials from a natural setting:

- Field permit number
- Name of the institution or relevant body that granted permission

**Data Availability**

Authors are required to make all data underlying the findings described fully available, without restriction, and from the time of publication. PLOS allows rare exceptions to address legal and ethical concerns. See the [PLOS Data Policy](#) and [FAQ](#) for detailed information.

Yes - all data are fully available without restriction

A Data Availability Statement describing where the data can be found is required at submission. Your answers to this question constitute the Data Availability Statement and **will be published in the article**, if accepted.

**Important:** Stating 'data available on request from the author' is not sufficient. If your data are only available upon request, select 'No' for the first question and explain your exceptional situation in the text box.

Do the authors confirm that all data underlying the findings described in their manuscript are fully available without restriction?

**Describe where the data may be found in full sentences. If you are copying our sample text, replace any instances of XXX with the appropriate details.**

- If the data are **held or will be held in a public repository**, include URLs, accession numbers or DOIs. If this information will only be available after acceptance, indicate this by ticking the box below. For example: *All XXX files are available from the XXX database (accession number(s) XXX, XXX).*
- If the data are all contained **within the manuscript and/or Supporting Information files**, enter the following: *All relevant data are within the manuscript and its Supporting Information files.*
- If neither of these applies but you are able to provide **details of access elsewhere**, with or without limitations, please do so. For example:

*Data cannot be shared publicly because of [XXX]. Data are available from the XXX Institutional Data Access / Ethics Committee (contact via XXX) for researchers who meet the criteria for access to confidential data.*

*The data underlying the results presented in the study are available from (include the name of the third party*

The sequences of the HAdV strains obtained in this study were deposited in the GenBank under the accession numbers MW594169-MW594198

*and contact information or URL).*

- This text is appropriate if the data are owned by a third party and authors do not have permission to share the data.

\* typeset

Additional data availability information:

1  
2  
3  
4  
5  
6  
7  
8  
9  
10  
11  
12  
13  
14  
15  
16  
17  
18  
19  
20  
21  
22  
23  
24  
25  
26  
27  
28  
29  
30  
31  
32  
33  
34  
35  
36  
37  
38  
39  
40  
41  
42  
43  
44

Title:

Molecular Typing and Epidemiology Profiles of Human Adenovirus Infection among Hospitalized Patients with Severe Acute Respiratory Infection in Huzhou, China

Short title:

Human Adenovirus Infection in Hospitalized Patients in China

Deshun Xu, Liping Chen, Xiaofang Wu, Lei Ji

Author affiliations:

Huzhou Center for Disease Control and Prevention, Huzhou, Zhejiang Province, China

Email address:

Lei Ji: [jleichn@163.com](mailto:jleichn@163.com)

Deshun Xu: [xds666092@126.com](mailto:xds666092@126.com)

Liping Chen: [lipingchen1106@hotmail.com](mailto:lipingchen1106@hotmail.com)

Xiaofang Wu: [xf980718@126.com](mailto:xf980718@126.com)

\*Corresponding Author: Lei Ji

Email address: [jleichn@163.com](mailto:jleichn@163.com)

## Abstract

**Background:** Severe acute respiratory infections (SARI) threaten human health and cause a large number of hospitalized patients every year. However, as one of the most common pathogen that cause acute respiratory tract infection, the molecular epidemiological information relating to HAdV among patients with SARI is limited. Here, we evaluate the epidemiological and molecular characteristics of HAdV infections among hospitalized patients with SARI from January 2017 to December 2019 in Huzhou, China.

**Methods:** From January 2017 to December 2019, a total of 657 nasopharyngeal swabs collected from inpatients with SARI were screened for HAdV and other common respiratory viruses by multiplex real-time PCR. All samples that tested positive for HAdV were further typed by sequencing partial sequences of hexon gene. Genotypes of HAdV were confirmed by phylogenetic analysis. Epidemiological data were analyzed using Microsoft Excel 2010 and service solutions (SPSS) 21.0 software.

**Results:** 251 (38.20%) samples were positive for at least one respiratory virus. HAdV was the second common viral pathogen detected, with a detection rate of 7.08%. Infection with HAdV was found in all age groups tested (0~, 2~, 5~, 15~, 50~, 65~). Children under 15 years old accounted for 84.62% (44/52) of the infections. Higher activity of HAdV infection could be seen in spring-early autumn season. 7 different types of HAdV belonging to 4 species (HAdV-A, B, C, E) were identified in hospitalized SARI cases, with HAdV-B3 as the most prevalent HAdV types, followed by HAdV-B7 and HAdV-E4. HAdV-B3 was the most frequently detected genotype in 2017 and 2019, accounting for 75.00% (9/12) and 63.64% (7/11) of typed HAdV infections in 2017 and 2019 respectively. No predominant strain was responsible for HAdV infections in 2018, although HAdV-B7 (28.57%, 2/7) and HAdV-C1 (28.57%, 2/7) were the major causative genotypes.

**Conclusions:** This study revealed the prevalence and the molecular epidemiological characteristics of HAdV infections among hospitalized patients with SARI in Huzhou from January 2017 to December 2019. The HAdV prevalence is related to age and season. As the most prevalent HAdV types, HAdV-B3 was co-circulating with other types and presented an alternate prevalence pattern.

**Keywords:** Human adenovirus ; Respiratory tract infection ; Epidemiology

## Background

Human adenoviruses (HAdVs) are non-enveloped, double-stranded DNA viruses belonging to the genus Mastadenovirus of the Adenoviridae family[1]. HAdVs have been recognized as pathogens that cause a broad spectrum of diseases, including respiratory illness, keratoconjunctivitis, gastroenteritis, cystitis and meningoencephalitis[2, 3]. They are associated with sporadic infection, as well as with community and institutional outbreaks. As a significant causative agent of respiratory tract illnesses, HAdV accounts for at least 5 to 10% of pediatric and 1 to 7% of adult respiratory tract infections (RTIs)[4, 5].

There are currently seven different HAdV species (HAdV-A through HAdV-G), and to date, 51 serotypes and over 70 genotypes have been identified based on serology, phylogenetic analyses and whole genomic sequencing (<http://hadvvg.gmu.edu/>). Different types of HAdVs display



87 different tissue tropisms that correlate with clinical manifestations of infection. The HAdV types  
88 most commonly associated with respiratory infection belong to HAdV species B  
89 (HAdV-3, HAdV-7, HAdV-11, HAdV-14, HAdV-21), HAdV species C (HAdV-C1, -C2, -C5, and  
90 -C6) and HAdV species E (HAdV-4)[3].

91 The predominant types of HAdV circulating at a given time differ among countries or regions and  
92 change over time. Replacement of dominant viruses by new strains may occur because  
93 transmission of novel strains between countries. During the last decade, outbreaks of respiratory  
94 tract infections caused by novel HAdV strains have occurred frequently in many countries  
95 including China[6, 7]. Therefore, clarifying the genotype of HAdV currently circulating is  
96 essential for epidemiological surveillance and a better understanding of the epidemic pattern of  
97 HAdV infection. At present, China has not yet established a national HAdV surveillance system.  
98 Although data about HAdV associated with respiratory infection in China can be found in several  
99 studies, most studies are performed with specific groups, especially for children[8-13]. There is a  
100 lack of epidemiological analyses of HAdV associated respiratory infection among patients in all  
101 age groups in China. The aim of this study was to evaluate the epidemiological and molecular  
102 characteristics of HAdV infections among hospitalized patients with severe acute respiratory  
103 infection (SARI) from January 2017 to December 2019 in Huzhou, a medium-sized city located in  
104 eastern China.

105

## 106 **Materials and methods**

### 107 **Ethics statement**

108 This study was part of the national SARI surveillance program and was approved by the human  
109 research ethics committee of Huzhou Center for Disease Control and Prevention. The only human  
110 materials used were nasopharyngeal swabs collected from patients for routine detection. Data  
111 records and collected clinical specimens were deidentified and anonymous. Oral informed  
112 consents were obtained from each participant.

### 113 **Patients and specimens**

114 During the influenza A H1N1 epidemic in 2009, a surveillance system for SARI was established to  
115 monitor influenza infection ~~in these cases in china~~. As local SARI surveillance sentinel hospital,  
116 the First People's Hospital of Huzhou was responsible for sample collection from ~~surveillance~~  
117 ~~cases~~. The inclusion criteria for hospitalized SARI cases were as follows: the onset of the disease  
118 has a history of fever(> 38°C), accompanied by cough, and the onset does not exceed 10 days.  
119 Nasopharyngeal swabs were freshly collected and sent to Huzhou Center for Disease Control and  
120 Prevention for routine detection. All the specimens were stored at - 80 °C until further processing.  
121 Demographic and clinical data were obtained from the hospital's database.

### 122 **Detection of HAdV and other common respiratory viruses**

123 Total viral nucleic acids (DNA and RNA) were extracted from 200 µL of each specimen using  
124 TIANLONG Ex Viral DNA/RNA Kit (TIANLONG Biotech, Xi'an, China) according to the  
125 manufacturer's instructions. Multiplex real-time PCR kit (BioGerm, Shanghai, China) was used to  
126 detect HAdV and other common respiratory virus pathogens, including Human Influenza  
127 virus(HIFV), Human respiratory syncytial virus(HRSV), Human rhinovirus(HRV), Human  
128 bocavirus( HBOV), Human metapneumovirus(HMPV), Human Parainfluenza Virus(HPIV) type  
129 1-4 and Human coronavirus (HCoV). The qPCR cycling program was as follows: 50 °C for 10

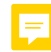

130 min, 95 °C for 5min, followed by 40 cycles of 95 °C for 10 s, and 55 °C for 40 s. Samples with a  
 131 cycle threshold (Ct) < 35 were regarded as positive.

132 **HAdV genotyping**

133 HAdV-positive samples were further molecularly typed by nested PCR amplification and  
 134 sequencing of HAdV hexon gene hyper-variable regions 1–6 (HVR1–6) as described  
 135 previously[14]. Primer set AdhexF1 (nt 19135–19160;5'-TICTTTGACATICGIGGIGTICTIGA-3')  
 136 and AdhexR1 (nt 20009–20030;5'-CTGTCIACIGCCTGRTTCCACA-3') were used for first-round  
 137 amplification; a second-round PCR was performed using primer set AdhexF2 (nt 19165–19187;  
 138 5'-GGYCCYAGYTTYAARCCCTAYTC-3') and AdhexR2 (nt 19960–19985;  
 139 5'-GGTTCTGTICCCAGAGARTCIAGCA-3') if insufficient DNA was amplified from the first  
 140 reaction for sequencing. The PCR products were visualized by electrophoresis and sent to TaKaRa  
 141 Biotechnology (Dalian, China) for further purification and sequencing.

142 **Phylogenetic analysis**

143 Partial nucleotide sequences of hexon gene obtained in this study were compared with the NCBI  
 144 GenBank database (<http://www.ncbi.nlm.nih.gov>) by using online BLAST tools to preliminarily  
 145 determine the genotype. Multiple sequence alignment and phylogenetic analysis were conducted  
 146 using MEGA software version 6.06. The phylogenetic tree was generated using the  
 147 neighbor-joining method and bootstrap analysis was performed with 1000 replications.

148 **Statistical analysis**

149 Epidemiological data were analyzed using Microsoft Excel 2010 and service solutions (SPSS)  
 150 21.0 software. Statistical differences were determined using the Chi-square test and P-values  
 151 <0.05 were considered to represent a statistically significant difference.

152 **Accession numbers**

153 The partial hexon gene sequences obtained in this study have been deposited in GenBank under  
 154 the accession numbers MW594169-MW594198.

155

156 **Results**

157 **Characteristics of the SARI cases and the Viral infection profiles**

158 From January 2017 to December 2019, a total of 657 specimens (191 in 2017, 204 in 2018 and  
 159 262 in 2019) were collected from inpatients with SARI during the study period. ~~Among those~~  
 160 ~~SARI cases,~~ 361 (54.95%) were male and 296 (45.05%) were female, ~~the~~ age range was from 1  
 161 month to 86 years old with 590 (89.80%) cases ~~were children younger than 15 years old.~~

162 The viral infection profiles are shown in Table 1. Overall, 251 (38.20%) samples were positive for  
 163 at least one respiratory virus, the detection rate of respiratory virus was 45.54% (87/191) in 2017,  
 164 36.27% (74/204) in 2018 and 34.35% (90/262) in 2019. During the study period, the most  
 165 commonly detected viral pathogen in SARI cases was RSV, with a prevalence rate of 10.65%  
 166 (70/657), followed by HAdV (7.91%, 52/657) and HIFV (6.09%, 40/657). HMPV was detected in  
 167 30 patients (4.57%), HPIV was detected in 24 (3.65%), HBOV was detected in 21 (3.20%), HRV  
 168 was detected in 11 (1.67%), and HCoV was detected in 3 patients (0.46%).

169 **Table 1 Viral infection profiles in hospitalized patients with SARI in Huzhou, 2017–2019**

| Years | SARI cases | Any viral etiology | Viral infection profiles  |          |      |      |      |      |     |          |
|-------|------------|--------------------|----------------------------------------------------------------------------------------------------------------|----------|------|------|------|------|-----|----------|
|       |            |                    | HRS<br>V                                                                                                       | HAd<br>V | HIFV | HMPV | HPIV | HBOV | HRV | HCo<br>V |

|              |            |            |           |           |           |           |           |           |           |          |
|--------------|------------|------------|-----------|-----------|-----------|-----------|-----------|-----------|-----------|----------|
| 2017         | 191        | 87         | 32        | 18        | 8         | 8         | 10        | 8         | 3         | 0        |
| 2018         | 204        | 74         | 17        | 8         | 21        | 14        | 5         | 7         | 2         | 0        |
| 2019         | 262        | 90         | 21        | 26        | 11        | 8         | 9         | 6         | 6         | 3        |
| <b>Total</b> | <b>657</b> | <b>251</b> | <b>70</b> | <b>52</b> | <b>40</b> | <b>30</b> | <b>24</b> | <b>21</b> | <b>11</b> | <b>3</b> |

170

### 171 **Epidemiology of HAdV**

172 ~~During our study period, HAdV was the second common viral pathogen detected in SARI cases,~~  
173 ~~with a detection rate of 7.91% (52/657). As shown in Table 2,~~ among the 52 HAdV-infected  
174 patients, 31 (58.33%) were male and 21 (41.67%) were female. No significant difference was  
175 observed in males and females in the HAdV-infected cases ( $P = 0.481$ ). Infection with HAdV was  
176 found in all age groups tested (0~, 2~, 5~, 15~, 50~, 65~). Children under 15 years old  
177 accounted for 84.62% (44/52) of the infections. There were no significant differences in HAdV  
178 detection rates among different age groups ( $P = 0.467$ ). The highest detection rate was in the 2-≤5  
179 year age group (9.44%), followed by 5-≤15 years (9.13%), 15-≤50 years (7.14%), 0-<2 years  
180 (5.05%), 50-<65 years (3.13%) and ≥65 years (2.86%).

181 **Table 2 HAdV-positive in hospitalized patients of different ages and gender with SARI**

| Variable           | Tested cases<br>N (percentage) | SARI cases<br>N (percentage) | HAdV-positive cases<br>N (percentage) | HAdV-negative cases<br>N (percentage) | Positive rate | $\chi^2$ | P     |
|--------------------|--------------------------------|------------------------------|---------------------------------------|---------------------------------------|---------------|----------|-------|
| <b>Gender</b>      |                                |                              |                                       |                                       |               | 0.497    | 0.481 |
| Male               | 361 (53.40)                    |                              | 31 (58.33)                            | 330(54.55)                            | 8.59%         |          |       |
| Female             | 296 (46.60)                    |                              | 21 (41.67)                            | 275(45.45)                            | 7.09%         |          |       |
| <b>Age (years)</b> |                                |                              |                                       |                                       |               | 0.431    | 0.476 |
| 0~                 | 99 (15.07)                     |                              | 5 (9.62)                              | 94 (16.55)                            | 5.05%         |          |       |
| 2~                 | 180 (27.40)                    |                              | 17 (32.69)                            | 163 (23.51)                           | 9.44%         |          |       |
| 5~                 | 241 (36.68)                    |                              | 22 (42.31)                            | 219 (43.05)                           | 9.13%         |          |       |
| 15~                | 70 (10.65)                     |                              | 5 (9.61)                              | 65 (6.95)                             | 7.14%         |          |       |
| 50~                | 32 (4.87)                      |                              | 1 (1.92)                              | 31 (4.64)                             | 3.13%         |          |       |
| 65~                | 35 (5.33)                      |                              | 1 (1.92)                              | 34 (5.30)                             | 2.86%         |          |       |
| <b>Total</b>       | <b>657</b>                     |                              | <b>52</b>                             | <b>605</b>                            | <b>7.91%</b>  |          |       |

182

### 183 **Fig. 1 Monthly distribution of HAdV infections from January 2017 to December 2019**

184

185 HAdV detection rate varied from year to year, from 9.42% (18/191) in 2017, 3.92% (8/204) in  
186 2018 to 9.92% (26/262) in 2019 (Table 1). The monthly distribution of HAdV infections is shown  
187 in Fig. 1. HAdV was detected in every month throughout the study period except January. Higher  
188 activity of HAdV infection could be seen from spring to early autumn (April to September), and  
189 the detection rate in September reached a peak of 28.17%. In contrast, lower activity of HAdV  
190 infection were observed during late autumn to winter (from October to February), when the  
191 average detection rate was only 2.37%.

192 Additionally, 13.46-% (n = 7) of the 52 HAdV-infected cases were co-detected with other  
193 respiratory pathogens. RSV (n = 3) was the most frequently co-detected virus. HPIV (n = 2),  
194 HMPV (n = 1) and HRV (n = 1) were also found to be co-infected with HAdV.

## 195 **HAdV genotyping and phylogenetic analysis**

196 Of the 52 HAdV--positive samples confirmed by real-time RT-PCR, 30 samples were successfully  
197 sequenced and genotyped by nested-PCR. Phylogenetic analysis based on partial hexon sequences  
198 indicated that 4 species (A, B, C, E) of HAdV, including 7 different types were identified  
199 throughout the study period, ~~see Fig. 2~~. HAdV-B3 (n = 17, 56.67 %) was the most prevalent HAdV  
200 types, followed by HAdV-B7 (n = 5, ~~16.367~~%) and HAdV-E4 (n = 3, 10.00 %). HAdV-C1 (n = 2,  
201 6.67 %), HAdV-C2(n =1,3.33 %), HAdV-B21(n =1,3.33 %) and HAdV-B55(n =1,3.33 %)were  
202 also detected. The genotype distribution of HAdV infections in each month is shown in Fig. 3. The  
203 predominant genotypes of HAdV during our study period varied according to surveillance year.  
204 Overall, HAdV-B3 was the most frequently detected genotype in 2017and 2019, accounting for  
205 75.00% (9/12) and 63.64(7/11) of typed HAdV infections ~~in 2017 and 2019~~, respectively. ~~5~~  
206 different types were detected in 2018, including HAdV-B7 (n = 2), HAdV-C1 (n = 2), HAdV-B3  
207 (n = 1), HAdV-B55 (n = 1) and HAdV-C2 (n = 1).No predominant strain was responsible for  
208 HAdV infections in 2018, although HAdV-B7 (28.57%, 2/7) and HAdV-C1 (28.57%, 2/7) were  
209 the major causative genotypes.

210

211 **Fig. 2 Phylogenetic analyses based on partial hexon sequences of HAdV strains.** The trees  
212 were generated using the neighbor-joining method, validated by 1000 bootstrap replicates.  
213 Bootstrap values  $\geq 70\%$  are shown on the branch. HAdV sequences identified in this study are  
214 indicated by closed circles.

215 **Fig. 3 Distribution of HAdV genotypes detected according to month.**

216

## 217 **Discussion**

218 SARI is one of the most common diseases in human and the leading cause of hospitalization in  
219 children worldwide[15, 16]. Because the early clinical symptoms of respiratory infections caused  
220 by viruses are similar, and the imaging findings lack specificity, pathogen detection is very  
221 important in clinical diagnosis and epidemiological monitoring. The present study was carried out  
222 from January 2017 to December 2019 among hospitalized patients with SARI in Huzhou, China.  
223 During the study period, a total of 657 hospitalized SARI cases were enrolled, of which 80.57%  
224 were children under 15 years of age. ~~It suggests~~ that SARI is still an important factor affecting the  
225 health of local children. ~~38.20%~~ of hospitalized SARI cases in our study exhibited at least one  
226 respiratory virus, which was consistent with previous reports from China (33.44%-41.50%)[17,  
227 18]and other countries (37.57%-41.8%)[19, 20].

228 HAdV was the second common viral pathogen detected, with a detection rate of 7.08%, which is  
229 lower than the finding in SARI cases of hospitalized children in Beijing (11.90%) and Shanghai  
230 (14.70%)[21]. Previous studies have indicated that HAdV is the major pathogen that causes  
231 respiratory tract infections in children, especially for children younger than 5 years[8, 10]. As  
232 expected, we found that HAdV infection mainly occurred in children under 15 years of age  
233 (84.62%), and the detection rate reached a peak (9.44%) in children aged 2 to  $\leq 5$  years.

234 Previous studies have shown that the epidemic peak seasons of HAdV-associated respiratory  
235 infections varies in different parts of China, and even in different monitoring years in the same  
236 region. Our study revealed that HAdV showed higher activity in the relatively high temperature  
237 seasons (spring to early autumn), which is similar to what has been found in Beijing (Northern

238 China)[8]and Guangzhou(Southern China)[13], where HAdV infections occurred throughout the  
239 year with the highest prevalence in the summer. However, this finding is discordant with other  
240 studies conducted in Northern China that have reported seasonal peaks for HAdV infections in  
241 winter and spring[9, 12]. It is worth mentioning that the surveillance period of the  
242 above-mentioned studies conducted in different regions of China varies, and the predominant  
243 HAdV types circulated are also different. A recent study from Hunan indicates that different  
244 HAdV types showed a different seasonal distribution patterns: HAdV-3 was the predominant type  
245 of HAdV infection during summer, while HAdV-7 had the highest detection rate during spring[11].  
246 Based on the above research, we speculate that the discrepant seasonal peak for HAdV infections  
247 are not only related to regional differences, but also related to the major types of HAdV circulating  
248 locally.

249 Globally the types most commonly associated with respiratory syndromes belong to HAdV  
250 species B, C or E. Many studies have reported that HAdV-B3, HAdV-B7 and HAdV-C2 are the  
251 most prevalent types in China, but the predominant type distribution vary among different regions  
252 and change over time. For example, most of HAdV-positive cases were caused by HAdV-B3 from  
253 2012 to 2013 in Southern China[13], while HAdV-B7 dominated in Northern China during the  
254 same study period[10]. However, recent reports indicated that the most predominant types have  
255 changed into HAdV-B3 and HAdV-C2 in some Northern cities of China in 2017-2018[8, 9].  
256 Throughout the present study period, 7 different types of HAdV belonging to 4 species (HAdV-A,  
257 B, C, E) were identified in hospitalized SARI cases, with HAdV-B3 as the most prevalent HAdV  
258 types, followed by HAdV-B7 and HAdV-E4. Our monitoring data showed that no type of HAdV  
259 presented absolutely predominant during HAdV epidemic seasons, HAdV-B3 was co-circulating  
260 with other types and presented an alternate prevalence pattern. Overall, HAdV-B3 was the most  
261 frequently detected genotype in 2017. No predominant strain was responsible for HAdV infections  
262 in 2018, with HAdV-B7 and HAdV-C1 as the major causative genotypes. HAdV-B3 re-emerged as  
263 the predominant genotype in 2019. Similar epidemic pattern were observed in a prolonged  
264 surveillance study conducted in southeastern China, where HAdV-7 and HAdV-3 alternate as the  
265 predominant genotypes causing pediatric pneumonia[22]. It is worth noting that in 2017 and 2019,  
266 when HAdV-3 presented as the predominant type detected, the detected rate of HAdV was  
267 significantly higher than that in 2017(9.42% in 2017, 3.92% in 2018 and 9.92%in 2019). The  
268 reasons need to be further explored. During HAdV infection, neutralizing antibodies are formed  
269 against the epitopes located in the hyper variable regions (HVRs) of the hexon protein. Just  
270 recently, Haque E et al. explore the variation in HVRs of hexon among globally distributed strains  
271 of HAdV-3[23]. They found that the HVRs of HAdV-3 strains circulating worldwide were highly  
272 heterogeneous and have been mutating continuously since their original isolation and suggested  
273 that, this heterogeneity may explain the worldwide increased prevalence of HAdV-3 respiratory  
274 infections.

275 Recent HAdV epidemiology studies showed that there was very high co-infection rate between  
276 HAdV and other pathogens in respiratory tract infection cases (37.50%-74.85%)[8, 9, 11]. In our  
277 study, coinfection of HAdVs and other respiratory viruses was only detected in 13.46 % of the  
278 SARI cases. Such discrepant co-infection rate may be caused by the different selection criteria of  
279 the research objects and methodological differences.

280 Our study is limited by a single-site setting, small sample size, and especially the partial  
281 genotyping of detected HAdVs. Genotyping was only successful for 57.69% (30/52) of HAdV

282 infection cases. Besides, typing of HAdV was merely performed by sequencing of partial hexon  
283 gene in the present study, which is hard to find any potential recombination between different  
284 types of HAdV strains.

## 285 **Conclusions**

286 In conclusion, this study revealed the prevalence and molecular epidemiological characteristics of  
287 HAdV infections among hospitalized patients with SARI in Huzhou from January 2017 to  
288 December 2019. HAdV was the second common viral pathogen detected in SARI cases, with most  
289 (84.62%) HAdV-positives cases detected among children < 15 years of age. Higher activity of  
290 HAdV infection could be seen in spring -early autumn season. No type of HAdV presented  
291 absolutely predominant during HAdV epidemic seasons, HAdV-B3 was co-circulating with other  
292 types and presented an alternate prevalence pattern. Our results provide a reliable scientific basis  
293 to better understand the role played by HAdVs in SARI cases, and for the prevention and control  
294 of HAdV infection.

### 295 **Authors' contributions**

296 LJ wrote the first draft and did the phylogenetic analysis. XFW and DSX participated in the  
297 HAdVs detection. LPC participated in the Genomic amplification for genotyping. GTL did the  
298 epidemiological investigation and performed the statistical analysis. All authors read and approved  
299 the final manuscript.

## 300 **Acknowledgements**

301 We thank the staff of the First People's Hospital in Huzhou for collecting the samples.

## 302 **References**

- 303 1. Hoeben RC, Uil TG. Adenovirus DNA replication. *Cold Spring Harb Perspect Biol.* 2013;5(3).
- 304 2. Ghebremedhin B. Human adenovirus: Viral pathogen with increasing importance. *Eur J Microbiol*  
305 *Immunol.* 2014;4(1):26-33.
- 306 3. Lynch JP, 3rd, Kajon AE. Adenovirus: Epidemiology, Global Spread of Novel Serotypes, and  
307 Advances in Treatment and Prevention. *Semin Respir Crit Care Med.* 2016;37(4):586-602.
- 308 4. Sandkovsky U, Vargas L, Florescu DF. Adenovirus: current epidemiology and emerging approaches  
309 to prevention and treatment. *Curr Infect Dis Rep.* 2014;16(8):014-0416.
- 310 5. Lee J, Choi EH, Lee HJ. Comprehensive serotyping and epidemiology of human adenovirus  
311 isolated from the respiratory tract of Korean children over 17 consecutive years (1991-2007). *J Med*  
312 *Virol.* 2010;82(4):624-31.
- 313 6. Lin MR, Yang SL, Gong YN, Kuo CC, Chiu CH, Chen CJ, et al. Clinical and molecular features of  
314 adenovirus type 2, 3, and 7 infections in children in an outbreak in Taiwan, 2011. *Clin Microbiol Infect.*  
315 2017;23(2):110-6.
- 316 7. Zhu Z, Zhang Y, Xu S, Yu P, Tian X, Wang L, et al. Outbreak of acute respiratory disease in China  
317 caused by B2 species of adenovirus type 11. *J Clin Microbiol.* 2009;47(3):697-703.
- 318 8. Yao LH, Wang C, Wei TL, Wang H, Ma FL, Zheng LS. Human adenovirus among hospitalized  
319 children with respiratory tract infections in Beijing, China, 2017-2018. *Virol J.* 2019;16(1):019-1185.
- 320 9. Zhao MC, Guo YH, Qiu FZ, Wang L, Yang S, Feng ZS, et al. Molecular and clinical characterization  
321 of human adenovirus associated with acute respiratory tract infection in hospitalized children. *J Clin*  
322 *Virol.* 2020;123(104254):25.

- 323 10. Liu C, Xiao Y, Zhang J, Ren L, Li J, Xie Z, et al. Adenovirus infection in children with acute lower  
324 respiratory tract infections in Beijing, China, 2007 to 2012. *BMC Infect Dis.* 2015;15(408):015-1126.
- 325 11. Xie L, Zhang B, Xiao N, Zhang F, Zhao X, Liu Q, et al. Epidemiology of human adenovirus infection  
326 in children hospitalized with lower respiratory tract infections in Hunan, China. *J Med Virol.*  
327 2019;91(3):392-400.
- 328 12. Li Y, Zhou W, Zhao Y, Wang Y, Xie Z, Lou Y, et al. Molecular typing and epidemiology profiles of  
329 human adenovirus infection among paediatric patients with severe acute respiratory infection in  
330 China. *PLoS One.* 2015;10(4).
- 331 13. Chen Y, Liu F, Wang C, Zhao M, Deng L, Zhong J, et al. Molecular Identification and  
332 Epidemiological Features of Human Adenoviruses Associated with Acute Respiratory Infections in  
333 Hospitalized Children in Southern China, 2012-2013. *PLoS One.* 2016;11(5).
- 334 14. Lu X, Erdman DD. Molecular typing of human adenoviruses by PCR and sequencing of a partial  
335 region of the hexon gene. *Arch Virol.* 2006;151(8):1587-602.
- 336 15. Williams BG, Gouws E, Boschi-Pinto C, Bryce J, Dye C. Estimates of world-wide distribution of  
337 child deaths from acute respiratory infections. *Lancet Infect Dis.* 2002;2(1):25-32.
- 338 16. Chakhunashvili G, Wagner AL, Power LE, Janusz CB, Machabishvili A, Karseladze I, et al. Severe  
339 Acute Respiratory Infection (SARI) sentinel surveillance in the country of Georgia, 2015-2017. *PLoS*  
340 *One.* 2018;13(7).
- 341 17. Zheng YX, Chen J, Kong DC, Pan H, Zhou YQ, Chen ML, et al. [Pathogenic characteristics of  
342 hospitalized severe acute respiratory infections in Shanghai, China, 2015-2017]. *Zhonghua Liu Xing*  
343 *Bing Xue Za Zhi.* 2019;40(8):911-6.
- 344 18. Xu W, Guo L, Dong X, Li X, Zhou P, Ni Q, et al. Detection of Viruses and *Mycoplasma pneumoniae*  
345 in Hospitalized Patients with Severe Acute Respiratory Infection in Northern China, 2015-2016. *Jpn J*  
346 *Infect Dis.* 2018;71(2):134-9.
- 347 19. Chittaganpitch M, Waicharoen S, Yingyong T, Praphasiri P, Sangkitporn S, Olsen SJ, et al. Viral  
348 etiologies of influenza-like illness and severe acute respiratory infections in Thailand. *Influenza Other*  
349 *Respir Viruses.* 2018;12(4):482-9.
- 350 20. Alroy KA, Do TT, Tran PD, Dang TQ, Vu LN, Le NTH, et al. Expanding severe acute respiratory  
351 infection (SARI) surveillance beyond influenza: The process and data from 1 year of implementation in  
352 Vietnam. *Influenza Other Respir Viruses.* 2018;12(5):632-42.
- 353 21. Zhao Y, Lu R, Shen J, Xie Z, Liu G, Tan W. Comparison of viral and epidemiological profiles of  
354 hospitalized children with severe acute respiratory infection in Beijing and Shanghai, China. *BMC*  
355 *Infect Dis.* 2019;19(1):019-4385.
- 356 22. Wo Y, Lu QB, Huang DD, Li XK, Guo CT, Wang HY, et al. Epidemical features of HAdV-3 and HAdV-7  
357 in pediatric pneumonia in Chongqing, China. *Arch Virol.* 2015;160(3):633-8.
- 358 23. Haque E, Banik U, Monowar T, Anthony L, Adhikary AK. Worldwide increased prevalence of  
359 human adenovirus type 3 (HAdV-3) respiratory infections is well correlated with heterogeneous  
360 hypervariable regions (HVRs) of hexon. *PLoS One.* 2018;13(3).

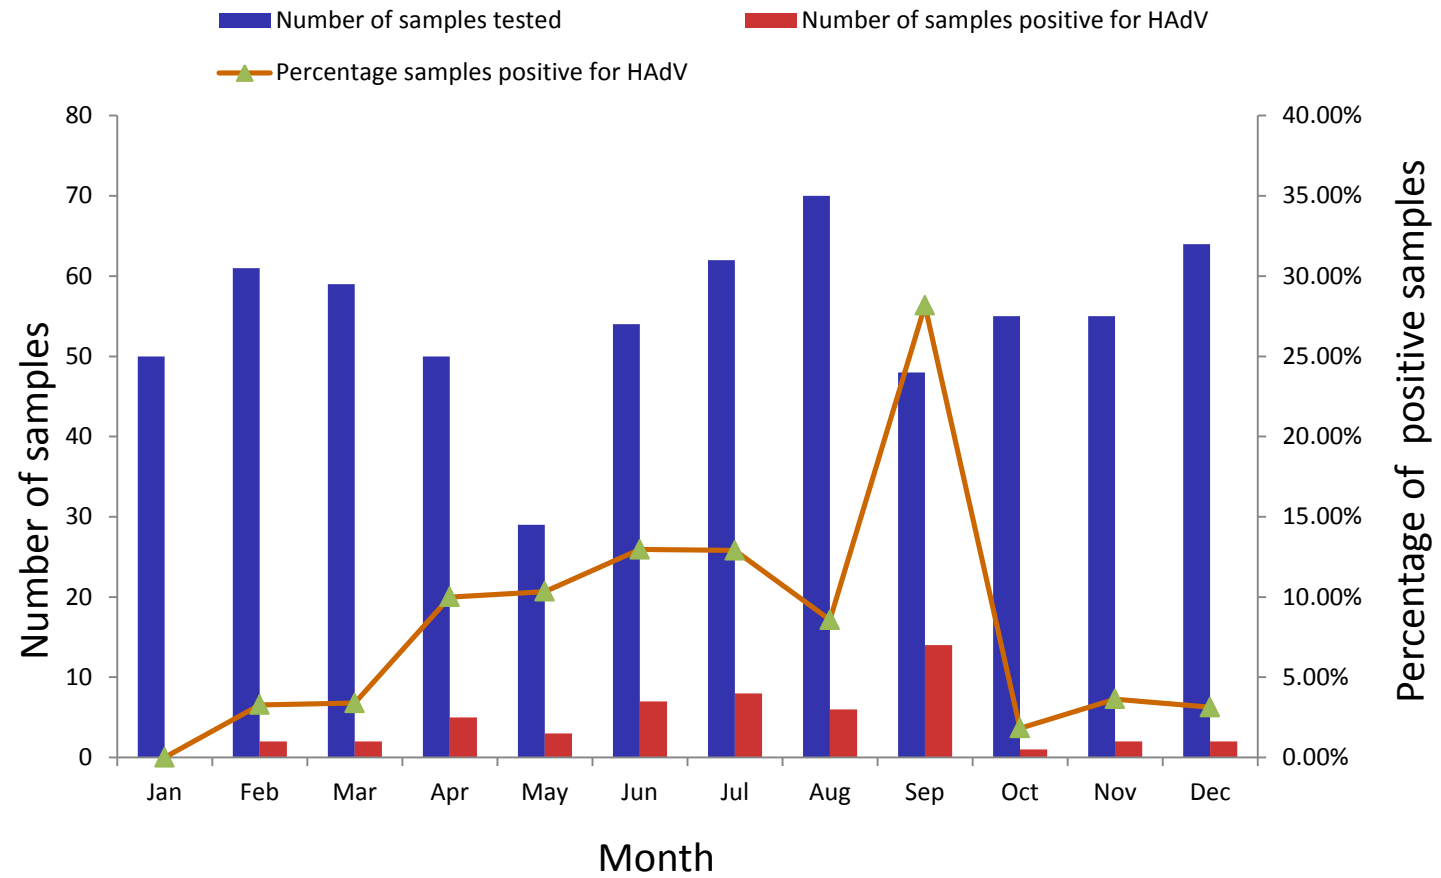



Figure2

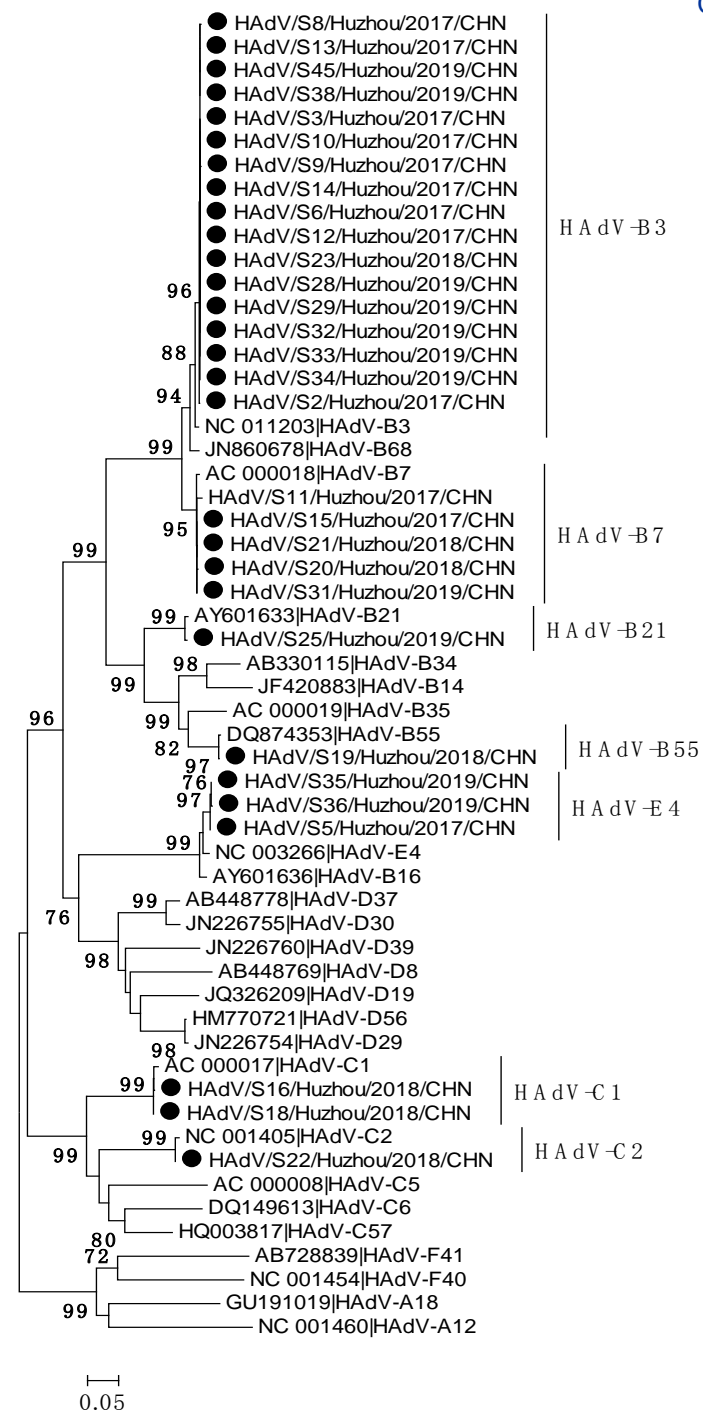

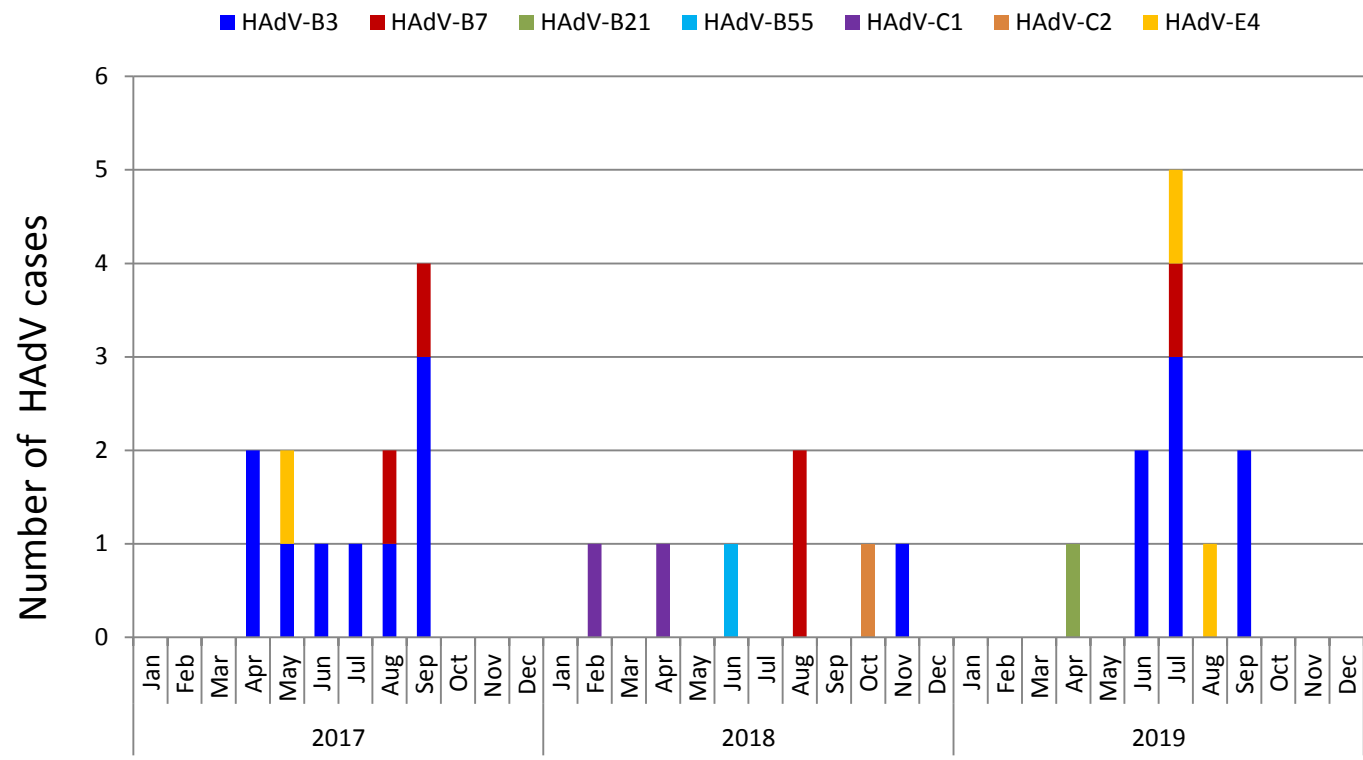

Supplement: pone.0265987.s002.pdf [file pone.0265987.s002.pdf]
