# Supplementary material for: Molecular typing and epidemiology profiles of human adenovirus infection among hospitalized patients with severe acute respiratory infection in Huzhou, China
Source: PubMed Central journal article supplement (PMC9022850; doi:10.1371/journal.pone.0265987), 2022-04-21
Supplement: pone.0265987.s004.pdf [file pone.0265987.s004.pdf]

# PLOS ONE

## Molecular Typing and Epidemiology Profiles of Human Adenovirus Infection among Hospitalized Patients with Severe Acute Respiratory Infection in Huzhou, China --Manuscript Draft--

|                               |                                                                                                                                                                                                                                                                                                                                                                                                                                                                                                                                                                                                                                                                                                                                                                                                                                                                                                                                                                                                                                                                                                                                                                                                                                                                                                                                                                                                                                                                                                                                                                                                                                                                                                                                                                                                                                                                                                                                                                                                                                                                                                                                                                                                                                                                                                                                                                                                                                                                 |
|-------------------------------|-----------------------------------------------------------------------------------------------------------------------------------------------------------------------------------------------------------------------------------------------------------------------------------------------------------------------------------------------------------------------------------------------------------------------------------------------------------------------------------------------------------------------------------------------------------------------------------------------------------------------------------------------------------------------------------------------------------------------------------------------------------------------------------------------------------------------------------------------------------------------------------------------------------------------------------------------------------------------------------------------------------------------------------------------------------------------------------------------------------------------------------------------------------------------------------------------------------------------------------------------------------------------------------------------------------------------------------------------------------------------------------------------------------------------------------------------------------------------------------------------------------------------------------------------------------------------------------------------------------------------------------------------------------------------------------------------------------------------------------------------------------------------------------------------------------------------------------------------------------------------------------------------------------------------------------------------------------------------------------------------------------------------------------------------------------------------------------------------------------------------------------------------------------------------------------------------------------------------------------------------------------------------------------------------------------------------------------------------------------------------------------------------------------------------------------------------------------------|
| <b>Manuscript Number:</b>     | PONE-D-21-05692R1                                                                                                                                                                                                                                                                                                                                                                                                                                                                                                                                                                                                                                                                                                                                                                                                                                                                                                                                                                                                                                                                                                                                                                                                                                                                                                                                                                                                                                                                                                                                                                                                                                                                                                                                                                                                                                                                                                                                                                                                                                                                                                                                                                                                                                                                                                                                                                                                                                               |
| <b>Article Type:</b>          | Research Article                                                                                                                                                                                                                                                                                                                                                                                                                                                                                                                                                                                                                                                                                                                                                                                                                                                                                                                                                                                                                                                                                                                                                                                                                                                                                                                                                                                                                                                                                                                                                                                                                                                                                                                                                                                                                                                                                                                                                                                                                                                                                                                                                                                                                                                                                                                                                                                                                                                |
| <b>Full Title:</b>            | Molecular Typing and Epidemiology Profiles of Human Adenovirus Infection among Hospitalized Patients with Severe Acute Respiratory Infection in Huzhou, China                                                                                                                                                                                                                                                                                                                                                                                                                                                                                                                                                                                                                                                                                                                                                                                                                                                                                                                                                                                                                                                                                                                                                                                                                                                                                                                                                                                                                                                                                                                                                                                                                                                                                                                                                                                                                                                                                                                                                                                                                                                                                                                                                                                                                                                                                                   |
| <b>Short Title:</b>           | Human Adenovirus Infection in Hospitalized Patients in China                                                                                                                                                                                                                                                                                                                                                                                                                                                                                                                                                                                                                                                                                                                                                                                                                                                                                                                                                                                                                                                                                                                                                                                                                                                                                                                                                                                                                                                                                                                                                                                                                                                                                                                                                                                                                                                                                                                                                                                                                                                                                                                                                                                                                                                                                                                                                                                                    |
| <b>Corresponding Author:</b>  | Lei Ji<br>Huzhou Center for Disease Control and Prevention<br>Huzhou, CHINA                                                                                                                                                                                                                                                                                                                                                                                                                                                                                                                                                                                                                                                                                                                                                                                                                                                                                                                                                                                                                                                                                                                                                                                                                                                                                                                                                                                                                                                                                                                                                                                                                                                                                                                                                                                                                                                                                                                                                                                                                                                                                                                                                                                                                                                                                                                                                                                     |
| <b>Keywords:</b>              | Human adenovirus; respiratory tract infection; Epidemiology                                                                                                                                                                                                                                                                                                                                                                                                                                                                                                                                                                                                                                                                                                                                                                                                                                                                                                                                                                                                                                                                                                                                                                                                                                                                                                                                                                                                                                                                                                                                                                                                                                                                                                                                                                                                                                                                                                                                                                                                                                                                                                                                                                                                                                                                                                                                                                                                     |
| <b>Abstract:</b>              | <p><b>Background:</b> Severe acute respiratory infections (SARI) threaten human health and cause a large number of hospitalizations every year. However, as one of the most common pathogen that cause acute respiratory tract infection, the molecular epidemiological information relating to human adenoviruses (HAdVs) among patients with SARI is limited. Here, we evaluate the epidemiological and molecular characteristics of HAdV infections among hospitalized patients with SARI from January 2017 to December 2019 in Huzhou, China.</p> <p><b>Methods:</b> From January 2017 to December 2019, a total of 657 nasopharyngeal swabs collected from inpatients with SARI were screened for HAdV and other common respiratory viruses by multiplex real-time PCR. All samples that tested positive for HAdV were further typed by sequencing partial sequences of hexon gene. Genotypes of HAdV were confirmed by phylogenetic analysis. Epidemiological data were analyzed using Microsoft Excel 2010 and service solutions (SPSS) 21.0 software.</p> <p><b>Results:</b> 251 (38.20%) samples were positive for at least one respiratory virus. HAdV was the second common viral pathogen detected, with a detection rate of 7.08%. Infection with HAdV was found in all age groups tested (0≤2, 2≤5, 5≤15, 15≤50, 50≤65, ≥65). Children under 15 years old accounted for 84.62% (44/52) of the infections. Higher activity of HAdV infection could be seen in spring-early autumn season. Seven different types of HAdV belonging to 4 species (HAdV-A, B, C, E) were identified in hospitalized SARI cases, with HAdV-B3 as the most prevalent HAdV types, followed by HAdV-B7 and HAdV-E4. HAdV-B3 was the most frequently detected genotype in 2017 and 2019, accounting for 75.00% (9/12) and 63.64% (7/11) of typed HAdV infections in 2017 and 2019, respectively. No predominant strain was responsible for HAdV infections in 2018, although HAdV-B7 (28.57%, 2/7) and HAdV-C1 (28.57%, 2/7) were the major causative genotypes.</p> <p><b>Conclusions:</b> This study revealed the prevalence and the molecular epidemiological characteristics of HAdV infections among hospitalized patients with SARI in Huzhou from January 2017 to December 2019. The HAdV prevalence is related to age and season. As the most prevalent HAdV types, HAdV-B3 was co-circulating with other types and presented an alternate prevalence pattern.</p> |
| <b>Order of Authors:</b>      | Deshun Xu<br>Liping Chen<br>Xiaofang Wu<br>Lei Ji                                                                                                                                                                                                                                                                                                                                                                                                                                                                                                                                                                                                                                                                                                                                                                                                                                                                                                                                                                                                                                                                                                                                                                                                                                                                                                                                                                                                                                                                                                                                                                                                                                                                                                                                                                                                                                                                                                                                                                                                                                                                                                                                                                                                                                                                                                                                                                                                               |
| <b>Response to Reviewers:</b> | <p>Responses to the reviewers' comments:<br/>(Q as comments, A as our responses)</p> <p>Reviewer 1<br/>Q: Considering that HAdV is an important respiratory virus worldwide, I suggest discussing the findings of the study with studies performed in other countries, such as in Europe (Price RHM et al., <a href="https://doi.org/10.1038/s41598-018-37481-y">https://doi.org/10.1038/s41598-018-37481-y</a>) and South America (Pscheidt et al., DOI: 10.1002/rmv.2189). When discussing HAdV seasonality,</p>                                                                                                                                                                                                                                                                                                                                                                                                                                                                                                                                                                                                                                                                                                                                                                                                                                                                                                                                                                                                                                                                                                                                                                                                                                                                                                                                                                                                                                                                                                                                                                                                                                                                                                                                                                                                                                                                                                                                              |

|                                                                                                                                                                                                                                                                                                                                                                                                                                        |                                                                                                                                                                                                                                                                                                                                                                                                                                                                                                                                                                                                                                                                                                                                                                                                                                                                                                                                                                                                                                                                                                                                                                                                                                                                                                                                                                                                                                                                                                                                                                                                                                                                                                                                                                                                                                                                                                                                                                                                                                                                                                                                                                                                                                                                                                                                                                                                                                                                                                                                                                                                                                                                                                                                                                                                         |
|----------------------------------------------------------------------------------------------------------------------------------------------------------------------------------------------------------------------------------------------------------------------------------------------------------------------------------------------------------------------------------------------------------------------------------------|---------------------------------------------------------------------------------------------------------------------------------------------------------------------------------------------------------------------------------------------------------------------------------------------------------------------------------------------------------------------------------------------------------------------------------------------------------------------------------------------------------------------------------------------------------------------------------------------------------------------------------------------------------------------------------------------------------------------------------------------------------------------------------------------------------------------------------------------------------------------------------------------------------------------------------------------------------------------------------------------------------------------------------------------------------------------------------------------------------------------------------------------------------------------------------------------------------------------------------------------------------------------------------------------------------------------------------------------------------------------------------------------------------------------------------------------------------------------------------------------------------------------------------------------------------------------------------------------------------------------------------------------------------------------------------------------------------------------------------------------------------------------------------------------------------------------------------------------------------------------------------------------------------------------------------------------------------------------------------------------------------------------------------------------------------------------------------------------------------------------------------------------------------------------------------------------------------------------------------------------------------------------------------------------------------------------------------------------------------------------------------------------------------------------------------------------------------------------------------------------------------------------------------------------------------------------------------------------------------------------------------------------------------------------------------------------------------------------------------------------------------------------------------------------------------|
|                                                                                                                                                                                                                                                                                                                                                                                                                                        | <p>I suggest comparing the study with those from other geographic regions, as viral circulation has been associated with temperature and circulation of other respiratory viruses.</p> <p>A: Thanks for the reviewer's suggestion. The two references mentioned above have been added (see line 230, 239,242). "Most respiratory viral infections have seasonality, of note, this seasonality might vary according to geographical location. Price RHM et al. have investigated the relationship between meteorological factors and viral seasonality in Scotland over a 6.5-year period. In their study, HAdV is present throughout the year without a clear seasonality and prefer temperatures around 9 °C. In another study conducted in patients with respiratory infection in southern Brazil, HAdV circulated year-round, with higher frequency during winter and early spring." We have added these sentences to the manuscript, see line 238-245.</p> <p>Q: There are several English and typing details that should be revised and corrected, as pointed in the pdf file. For example, symbols such as ~ to describe age group (0 ~ , 2 ~ , 5 ~ ,15 ~ , 50 ~ , 65 ~ ) does not make much sense. Please use 0≤2; 2≤5; 5≤15, etc.</p> <p>A: Thanks for the reviewer's suggestion. Corrections have been made in the revised version.</p> <p>Q: In the methodology, I believe there is a step missing in the PCR description. Isn't there an extension step at 72°C after the annealing step?</p> <p>A: According to the multiplex real-time PCR kit's instructions, the qPCR cycling program was as 50 °C for 10 min, 95 °C for 5min, followed by 40 cycles of 95 °C for 10 s, and 55 °C for 40 s. The same temperature (55 °C) is used for the annealing and extension steps.</p> <p>Q: In Table 1, I suggest including the percentage in addition to the number of cases – N (%).</p> <p>In Table 2, use Sex instead of Gender.</p> <p>A: Thanks for the reviewer's suggestion. Corrections have been made in the revised version .</p> <p>Q: Other comments and suggestions can be found in the pdf file (attached).</p> <p>A: Thanks. Corrections have been made in the revised version according to comments and suggestions in the pdf file.</p> <p>Reviewer 2</p> <p>Q: I have only one comment: The authors were unable to type up to 42.3% (22/52) of the study samples. What could explain this high failure rate.</p> <p>A: Thanks for the reviewer's suggestion. Since the sensitivity of ordinary RT-PCR is lower than that of real-time RT-PCR, more accurate genotyping was only possible for 57.7% (30/52) of the HAdV-positive samples confirmed by real-time RT-PCR, the remaining 22 samples with most of them got a cycle threshold (Ct) ≥ 30 were failed to genotyped.</p> |
| <b>Additional Information:</b>                                                                                                                                                                                                                                                                                                                                                                                                         |                                                                                                                                                                                                                                                                                                                                                                                                                                                                                                                                                                                                                                                                                                                                                                                                                                                                                                                                                                                                                                                                                                                                                                                                                                                                                                                                                                                                                                                                                                                                                                                                                                                                                                                                                                                                                                                                                                                                                                                                                                                                                                                                                                                                                                                                                                                                                                                                                                                                                                                                                                                                                                                                                                                                                                                                         |
| <b>Question</b>                                                                                                                                                                                                                                                                                                                                                                                                                        | <b>Response</b>                                                                                                                                                                                                                                                                                                                                                                                                                                                                                                                                                                                                                                                                                                                                                                                                                                                                                                                                                                                                                                                                                                                                                                                                                                                                                                                                                                                                                                                                                                                                                                                                                                                                                                                                                                                                                                                                                                                                                                                                                                                                                                                                                                                                                                                                                                                                                                                                                                                                                                                                                                                                                                                                                                                                                                                         |
| <p><b>Financial Disclosure</b></p> <p>Enter a financial disclosure statement that describes the sources of funding for the work included in this submission. Review the <a href="#">submission guidelines</a> for detailed requirements. View published research articles from <a href="#">PLOS ONE</a> for specific examples.</p> <p>This statement is required for submission and <b>will appear in the published article</b> if</p> | <p>The author(s) received no specific funding for this work</p>                                                                                                                                                                                                                                                                                                                                                                                                                                                                                                                                                                                                                                                                                                                                                                                                                                                                                                                                                                                                                                                                                                                                                                                                                                                                                                                                                                                                                                                                                                                                                                                                                                                                                                                                                                                                                                                                                                                                                                                                                                                                                                                                                                                                                                                                                                                                                                                                                                                                                                                                                                                                                                                                                                                                         |

the submission is accepted. Please make sure it is accurate.

#### Unfunded studies

Enter: *The author(s) received no specific funding for this work.*

#### Funded studies

Enter a statement with the following details:

- Initials of the authors who received each award
- Grant numbers awarded to each author
- The full name of each funder
- URL of each funder website
- Did the sponsors or funders play any role in the study design, data collection and analysis, decision to publish, or preparation of the manuscript?
- **NO** - Include this sentence at the end of your statement: *The funders had no role in study design, data collection and analysis, decision to publish, or preparation of the manuscript.*
- **YES** - Specify the role(s) played.

\* typeset

#### Competing Interests

Use the instructions below to enter a competing interest statement for this submission. On behalf of all authors, disclose any [competing interests](#) that could be perceived to bias this work—acknowledging all financial support and any other relevant financial or non-financial competing interests.

This statement is **required** for submission and **will appear in the published article** if the submission is accepted. Please make sure it is accurate and that any funding sources listed in your Funding Information later in the submission form are also declared in your Financial Disclosure statement.

View published research articles from [PLOS ONE](#) for specific examples.

The authors have declared that no competing interests exist

**NO authors have competing interests**

Enter: *The authors have declared that no competing interests exist.*

**Authors with competing interests**

Enter competing interest details beginning with this statement:

*I have read the journal's policy and the authors of this manuscript have the following competing interests: [insert competing interests here]*

\* typeset

**Ethics Statement**

Enter an ethics statement for this submission. This statement is required if the study involved:

- Human participants
- Human specimens or tissue
- Vertebrate animals or cephalopods
- Vertebrate embryos or tissues
- Field research

Write "N/A" if the submission does not require an ethics statement.

General guidance is provided below. Consult the [submission guidelines](#) for detailed instructions. **Make sure that all information entered here is included in the Methods section of the manuscript.**

This study was part of the national SARI surveillance program and was approved by the human research ethics committee of Huzhou Center for Disease Control and Prevention. The only human materials used were nasopharyngeal swabs collected from patients for routine detection. Oral informed consents were obtained from each participant.

**Format for specific study types**

**Human Subject Research (involving human participants and/or tissue)**

- Give the name of the institutional review board or ethics committee that approved the study
- Include the approval number and/or a statement indicating approval of this research
- Indicate the form of consent obtained (written/oral) or the reason that consent was not obtained (e.g. the data were analyzed anonymously)

**Animal Research (involving vertebrate animals, embryos or tissues)**

- Provide the name of the Institutional Animal Care and Use Committee (IACUC) or other relevant ethics board that reviewed the study protocol, and indicate whether they approved this research or granted a formal waiver of ethical approval
- Include an approval number if one was obtained
- If the study involved *non-human primates*, add *additional details* about animal welfare and steps taken to ameliorate suffering
- If anesthesia, euthanasia, or any kind of animal sacrifice is part of the study, include briefly which substances and/or methods were applied

**Field Research**

Include the following details if this study involves the collection of plant, animal, or other materials from a natural setting:

- Field permit number
- Name of the institution or relevant body that granted permission

**Data Availability**

Authors are required to make all data underlying the findings described fully available, without restriction, and from the time of publication. PLOS allows rare exceptions to address legal and ethical concerns. See the [PLOS Data Policy](#) and [FAQ](#) for detailed information.

Yes - all data are fully available without restriction

A Data Availability Statement describing where the data can be found is required at submission. Your answers to this question constitute the Data Availability Statement and **will be published in the article**, if accepted.

**Important:** Stating 'data available on request from the author' is not sufficient. If your data are only available upon request, select 'No' for the first question and explain your exceptional situation in the text box.

Do the authors confirm that all data underlying the findings described in their manuscript are fully available without restriction?

**Describe where the data may be found in full sentences. If you are copying our sample text, replace any instances of XXX with the appropriate details.**

- If the data are **held or will be held in a public repository**, include URLs, accession numbers or DOIs. If this information will only be available after acceptance, indicate this by ticking the box below. For example: *All XXX files are available from the XXX database (accession number(s) XXX, XXX).*
- If the data are all contained **within the manuscript and/or Supporting Information files**, enter the following: *All relevant data are within the manuscript and its Supporting Information files.*
- If neither of these applies but you are able to provide **details of access elsewhere**, with or without limitations, please do so. For example:

*Data cannot be shared publicly because of [XXX]. Data are available from the XXX Institutional Data Access / Ethics Committee (contact via XXX) for researchers who meet the criteria for access to confidential data.*

*The data underlying the results presented in the study are available from (include the name of the third party*

The sequences of the HAdV strains obtained in this study were deposited in the GenBank under the accession numbers MW594169-MW594198

*and contact information or URL).*

- This text is appropriate if the data are owned by a third party and authors do not have permission to share the data.

\* typeset

Additional data availability information:

1  
2  
3  
4  
5  
6  
7  
8  
9  
10  
11  
12  
13  
14  
15  
16  
17  
18  
19  
20  
21  
22  
23  
24  
25  
26  
27  
28  
29  
30  
31  
32  
33  
34  
35  
36  
37  
38  
39  
40  
41  
42  
43  
44

Title:

Molecular Typing and Epidemiology Profiles of Human Adenovirus Infection among Hospitalized Patients with Severe Acute Respiratory Infection in Huzhou, China

Short title:

Human Adenovirus Infection in Hospitalized Patients in China

Deshun Xu, Liping Chen, Xiaofang Wu, Lei Ji

Author affiliations:

Huzhou Center for Disease Control and Prevention, Huzhou, Zhejiang Province, China

Email address:

Lei Ji: [jleichn@163.com](mailto:jleichn@163.com)

Deshun Xu: [xds666092@126.com](mailto:xds666092@126.com)

Liping Chen: [lipingchen1106@hotmail.com](mailto:lipingchen1106@hotmail.com)

Xiaofang Wu: [xf980718@126.com](mailto:xf980718@126.com)

\*Corresponding Author: Lei Ji

Email address: [jleichn@163.com](mailto:jleichn@163.com)



## 45 Abstract

46 **Background:** Severe acute respiratory infections (SARI) threaten human health and cause a large  
47 number of hospitalizations every year. However, as one of the most common pathogen that cause  
48 acute respiratory tract infection, the molecular epidemiological information relating to human  
49 adenoviruses (HAdVs) among patients with SARI is limited. Here, we evaluate the  
50 epidemiological and molecular characteristics of HAdV infections among hospitalized patients  
51 with SARI from January 2017 to December 2019 in Huzhou, China.

52 **Methods:** From January 2017 to December 2019, a total of 657 nasopharyngeal swabs collected  
53 from inpatients with SARI were screened for HAdV and other common respiratory viruses by  
54 multiplex real-time PCR. All samples that tested positive for HAdV were further typed by  
55 sequencing partial sequences of hexon gene. Genotypes of HAdV were confirmed by phylogenetic  
56 analysis. Epidemiological data were analyzed using Microsoft Excel 2010 and service solutions  
57 (SPSS) 21.0 software.

58 **Results:** 251 (38.20%) samples were positive for at least one respiratory virus. HAdV was the  
59 second common viral pathogen detected, with a detection rate of 7.08%. Infection with HAdV was  
60 found in all age groups tested ( $0 \leq 2$ ,  $2 \leq 5$ ,  $5 \leq 15$ ,  $15 \leq 50$ ,  $50 \leq 65$ ,  $\geq 65$ ). Children under 15  
61 years old accounted for 84.62% (44/52) of the infections. Higher activity of HAdV infection could  
62 be seen in spring-early autumn season. Seven different types of HAdV belonging to 4 species  
63 (HAdV-A, B, C, E) were identified in hospitalized SARI cases, with HAdV-B3 as the most  
64 prevalent HAdV types, followed by HAdV-B7 and HAdV-E4. HAdV-B3 was the most frequently  
65 detected genotype in 2017 and 2019, accounting for 75.00% (9/12) and 63.64% (7/11) of typed  
66 HAdV infections in 2017 and 2019, respectively. No predominant strain was responsible for  
67 HAdV infections in 2018, although HAdV-B7 (28.57%, 2/7) and HAdV-C1 (28.57%, 2/7) were  
68 the major causative genotypes.

69 **Conclusions:** This study revealed the prevalence and the molecular epidemiological  
70 characteristics of HAdV infections among hospitalized patients with SARI in Huzhou from  
71 January 2017 to December 2019. The HAdV prevalence is related to age and season. As the most  
72 prevalent HAdV types, HAdV-B3 was co-circulating with other types and presented an alternate  
73 prevalence pattern.

74 **Keywords:** Human adenovirus; Respiratory tract infection; Epidemiology

## 76 Background

77 Human adenoviruses (HAdVs) are non-enveloped, double-stranded DNA viruses belonging to the  
78 genus Mastadenovirus of the Adenoviridae family[1]. HAdVs have been recognized as pathogens  
79 that cause a broad spectrum of diseases, including respiratory illness, keratoconjunctivitis,  
80 gastroenteritis, cystitis and meningoencephalitis[2, 3]. They are associated with sporadic infection,  
81 as well as with community and institutional outbreaks. As a significant causative agent of  
82 respiratory tract illnesses, HAdV accounts for at least 5 to 10% of pediatric and 1 to 7% of adult  
83 respiratory tract infections (RTIs)[4, 5].

84 There are currently seven different HAdV species (HAdV-A through HAdV-G), and to date, 51  
85 serotypes and over 70 genotypes have been identified based on serology, phylogenetic analyses  
86 and whole genomic sequencing (<http://hadvvg.gmu.edu/>). Different types of HAdVs display

87 different tissue tropisms that correlate with clinical manifestations of infection. The HAdV types  
88 most commonly associated with respiratory infection belong to HAdV species B (HAdV-3,  
89 HAdV-7, HAdV-11, HAdV-14, HAdV-21), HAdV species C (HAdV-C1, -C2, -C5, and -C6) and  
90 HAdV species E (HAdV-4)[3].

91 The predominant types of HAdV circulating at a given time differ among countries or regions and  
92 change over time. Replacement of dominant viruses by new strains may occur because  
93 transmission of novel strains between countries. During the last decade, outbreaks of respiratory  
94 tract infections caused by novel HAdV strains have occurred frequently in many countries  
95 including China[6, 7]. Therefore, clarifying the genotype of HAdV currently circulating is  
96 essential for epidemiological surveillance and a better understanding of the epidemic pattern of  
97 HAdV infection. At present, China has not yet established a national HAdV surveillance system.  
98 Although data about HAdV associated with respiratory infection in China can be found in several  
99 studies, most studies are performed with specific groups, especially for children[8-13]. There is a  
100 lack of epidemiological analyses of HAdV associated respiratory infection among patients in all  
101 age groups in China. The aim of this study was to evaluate the epidemiological and molecular  
102 characteristics of HAdV infections among hospitalized patients with severe acute respiratory  
103 infection (SARI) from January 2017 to December 2019 in Huzhou, a medium-sized city located in  
104 eastern China.

105

## 106 **Materials and methods**

### 107 **Ethics statement**

108 This study was part of the national SARI surveillance program and was approved by the human  
109 research ethics committee of Huzhou Center for Disease Control and Prevention. The only human  
110 materials used were nasopharyngeal swabs collected from patients for routine detection. Data  
111 records and collected clinical specimens were deidentified and anonymous. Oral informed  
112 consents were obtained from each participant.

### 113 **Patients and specimens**

114 During the influenza A H1N1 epidemic in 2009, a surveillance system for SARI was established to  
115 monitor influenza infection in China. As local SARI surveillance sentinel hospital, the First  
116 People's Hospital of Huzhou was responsible for sample collection from patients. The inclusion  
117 criteria for hospitalized SARI cases were as follows: the onset of the disease has a history of fever  
118 (> 38°C), accompanied by cough, and the onset does not exceed 10 days. Nasopharyngeal swabs  
119 were freshly collected and sent to Huzhou Center for Disease Control and Prevention for routine  
120 detection. All the specimens were stored at - 80 °C until further processing. Demographic and  
121 clinical data were obtained from the hospital's database.

### 122 **Detection of HAdV and other common respiratory viruses**

123 Total viral nucleic acids (DNA and RNA) were extracted from 200 µL of each specimen using  
124 TIANLONG Ex Viral DNA/RNA Kit (TIANLONG Biotech, Xi'an, China) according to the  
125 manufacturer's instructions. Multiplex real-time PCR kit (BioGerm, Shanghai, China) was used to  
126 detect HAdV and other common respiratory virus pathogens, including Human Influenza virus  
127 (HIFV), Human respiratory syncytial virus (HRSV), Human rhinovirus (HRV), Human  
128 bocavirus (HBOV), Human metapneumovirus (HMPV), Human Parainfluenza Virus (HPIV) type  
129 1-4 and **Human coronavirus** (HCoV). The qPCR cycling program was as follows: 50 °C for 10

130 min, 95 °C for 5min, followed by 40 cycles of 95 °C for 10 s, and 55 °C for 40 s. Samples with a  
131 cycle threshold (Ct) < 35 were regarded as positive.

### 132 **HAdV genotyping**

133 HAdV-positive samples were further molecularly typed by nested PCR amplification and  
134 sequencing of HAdV hexon gene hyper-variable regions 1–6 (HVR1–6) as described  
135 previously[14]. Primer set AdhexF1 (nt 19135–19160; 5'-TICTTTGACATICGIGGIGTICTIGA-  
136 3') and AdhexR1 (nt 20009–20030; 5'-CTGTTCIACIGCCTGRTTCCACA-3') were used for first-  
137 round amplification; a second-round PCR was performed using primer set AdhexF2 (nt 19165–  
138 19187; 5'-GGYCCYAGYTTYAARCCCTAYTC-3') and AdhexR2 (nt 19960–19985; 5'-  
139 GGTTCGTGTCICCCAGAGARTCIAGCA-3') if insufficient DNA was amplified from the first  
140 reaction for sequencing. The PCR products were visualized by electrophoresis and sent to TaKaRa  
141 Biotechnology (Dalian, China) for further purification and sequencing.

### 142 **Phylogenetic analysis**

143 Partial nucleotide sequences of hexon gene obtained in this study were compared with the NCBI  
144 GenBank database (<http://www.ncbi.nlm.nih.gov>) by using online BLAST tools to preliminarily  
145 determine the genotype. Multiple sequence alignment and phylogenetic analysis were conducted  
146 using MEGA software version 6.06. The phylogenetic tree was generated using the neighbor-  
147 joining method and bootstrap analysis was performed with 1000 replications.

### 148 **Statistical analysis**

149 Epidemiological data were analyzed using Microsoft Excel 2010 and service solutions (SPSS)  
150 21.0 software. Statistical differences were determined using the Chi-square test and P-values  
151 <0.05 were considered to represent a statistically significant difference.

### 152 **Accession numbers**

153 The partial hexon gene sequences obtained in this study have been deposited in GenBank under  
154 the accession numbers MW594169-MW594198.

155

## 156 **Results**

### 157 **Characteristics of the SARI cases and the Viral infection profiles**

158 From January 2017 to December 2019, a total of 657 specimens (191 in 2017, 204 in 2018 and  
159 262 in 2019) were collected from inpatients with SARI during the study period, of whom 361  
160 (54.95%) were male and 296 (45.05%) were female. The age range was from 1 month to 86 years  
161 old with 590 (89.80%) cases being individuals younger than 15 years old.

162 The viral infection profiles are shown in Table 1. Overall, 251 (38.20%) samples were positive for  
163 at least one respiratory virus, the detection rate of respiratory virus was 45.54% (87/191) in 2017,  
164 36.27% (74/204) in 2018 and 34.35% (90/262) in 2019. During the study period, the most  
165 commonly detected viral pathogen in SARI cases was RSV, with a prevalence rate of 10.65%  
166 (70/657), followed by HAdV (7.91%, 52/657) and HIFV (6.09%, 40/657). HMPV was detected in  
167 30 patients (4.57%), HPIV was detected in 24 (3.65%), HBOV was detected in 21 (3.20%), HRV  
168 was detected in 11 (1.67%), and HCoV was detected in 3 patients (0.46%).

169

170 **Table 1 Viral infection profiles in hospitalized patients with SARI in Huzhou, 2017–2019**

| Years | SARI cases | Any viral etiology | Viral infection profiles N (%) |          |      |      |      |      |     |           |
|-------|------------|--------------------|--------------------------------|----------|------|------|------|------|-----|-----------|
|       |            |                    | HRS<br>V                       | HAd<br>V | HIFV | HMPV | HPIV | HBOV | HRV | HCoV<br>V |

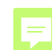

|       |     |     |               |              |               |              |              |              |              |             |
|-------|-----|-----|---------------|--------------|---------------|--------------|--------------|--------------|--------------|-------------|
| 2017  | 191 | 87  | 32<br>(16.75) | 18<br>(9.42) | 8<br>(4.19)   | 8<br>(4.19)  | 10<br>(5.24) | 8<br>(4.19)  | 3<br>(1.57)  | 0<br>(0.00) |
| 2018  | 204 | 74  | 17<br>(8.33)  | 8<br>(3.92)  | 21<br>(10.29) | 14<br>(6.86) | 5<br>(2.45)  | 7<br>(3.43)  | 2<br>(0.98)  | 0<br>(0.00) |
| 2019  | 262 | 90  | 21<br>(8.02)  | 26<br>(9.92) | 11<br>(4.20)  | 8<br>(3.05)  | 9<br>(3.44)  | 6<br>(2.29)  | 6<br>(2.29)  | 3<br>(1.15) |
| Total | 657 | 251 | 70<br>(10.65) | 52<br>(7.91) | 40<br>(6.09)  | 30<br>(4.57) | 24<br>(3.65) | 21<br>(3.20) | 11<br>(1.67) | 3<br>(0.46) |

171

172 **Epidemiology of HAdV**

173 Among the 52 HAdV-infected patients, 31 (58.33%) were male and 21 (41.67%) were female  
 174 (Table 2). No significant difference was observed in males and females in the HAdV-infected  
 175 cases ( $P = 0.481$ ). Infection with HAdV was found in all age groups tested ( $0 \leq 2$ ,  $2 \leq 5$ ,  $5 \leq 15$ ,  $15$   
 176  $\leq 50$ ,  $50 \leq 65$ ,  $\geq 65$ ). Children under 15 years old accounted for 84.62% (44/52) of the infections.  
 177 There were no significant differences in HAdV detection rates among different age groups ( $P =$   
 178  $0.467$ ). The highest detection rate was in the  $2 < 5$  year age group (9.44%), followed by  $5 < 15$   
 179 years (9.13%),  $15 < 50$  years (7.14%),  $0 < 2$  years (5.05%),  $50 < 65$  years (3.13%) and  $\geq 65$  years  
 180 (2.86%).

181 **Table 2 HAdV-positive in hospitalized patients of different ages and gender with SARI**

| Variable     | Tested cases<br>N (percentage) | SARI | HAdV-positive cases<br>N (percentage) | HAdV-negative cases<br>N (percentage) | Positive rate | $\chi^2$ | P     |
|--------------|--------------------------------|------|---------------------------------------|---------------------------------------|---------------|----------|-------|
| Sex          |                                |      |                                       |                                       |               | 0.497    | 0.481 |
| Male         | 361 (53.40)                    |      | 31 (58.33)                            | 330(54.55)                            | 8.59%         |          |       |
| Female       | 296 (46.60)                    |      | 21 (41.67)                            | 275(45.45)                            | 7.09%         |          |       |
| Age (years)  |                                |      |                                       |                                       |               | 0.431    | 0.476 |
| $0 \leq 2$   | 99 (15.07)                     |      | 5 (9.62)                              | 94 (16.55)                            | 5.05%         |          |       |
| $2 \leq 5$   | 180 (27.40)                    |      | 17 (32.69)                            | 163 (23.51)                           | 9.44%         |          |       |
| $5 \leq 15$  | 241 (36.68)                    |      | 22 (42.31)                            | 219 (43.05)                           | 9.13%         |          |       |
| $15 \leq 50$ | 70 (10.65)                     |      | 5 (9.61)                              | 65 (6.95)                             | 7.14%         |          |       |
| $50 \leq 65$ | 32 (4.87)                      |      | 1 (1.92)                              | 31 (4.64)                             | 3.13%         |          |       |
| $\geq 65$    | 35 (5.33)                      |      | 1 (1.92)                              | 34 (5.30)                             | 2.86%         |          |       |
| Total        | 657                            |      | 52                                    | 605                                   | 7.91%         |          |       |

182

183 **Fig. 1 Monthly distribution of HAdV infections from January 2017 to December 2019**

184

185 HAdV detection rate varied from year to year, from 9.42% (18/191) in 2017, 3.92% (8/204) in  
 186 2018 to 9.92% (26/262) in 2019 (Table 1). The monthly distribution of HAdV infections is shown  
 187 in Fig. 1. HAdV was detected in every month throughout the study period except January. Higher  
 188 activity of HAdV infection could be seen from spring to early autumn (April to September), and  
 189 the detection rate in September reached a peak of 28.17%. In contrast, lower activity of HAdV  
 190 infection were observed during late autumn to winter (from October to February), when the  
 191 average detection rate was only 2.37%.

192 Additionally, 13.46% (n = 7) of the 52 HAdV-infected cases were co-detected with other

193 respiratory pathogens. RSV (n = 3) was the most frequently co-detected virus. HPIV (n = 2),  
194 HMPV (n = 1) and HRV (n = 1) were also found to be co-infected with HAdV.

### 195 **HAdV genotyping and phylogenetic analysis**

196 Of the 52 HAdV-positive samples confirmed by real-time RT-PCR, 30 samples were successfully  
197 sequenced and genotyped by nested-PCR. Phylogenetic analysis based on partial hexon sequences  
198 indicated that 4 species (A, B, C, E) of HAdV, including 7 different types were identified  
199 throughout the study period (Fig. 2). HAdV-B3 (n = 17, 56.67 %) was the most prevalent HAdV  
200 types, followed by HAdV-B7 (n = 5, 16.67 %) and HAdV-E4 (n = 3, 10.00 %). HAdV-C1 (n = 2,  
201 6.67 %), HAdV-C2 (n = 1, 3.33 %), HAdV-B21 (n = 1, 3.33 %) and HAdV-B55 (n = 1, 3.33 %)  
202 were also detected. The genotype distribution of HAdV infections in each month is shown in Fig.  
203 3. The predominant genotypes of HAdV during our study period varied according to surveillance  
204 year. Overall, HAdV-B3 was the most frequently detected genotype in 2017 and 2019, accounting  
205 for 75.00% (9/12) and 63.64 (7/11) of typed HAdV infections, respectively. Five different types  
206 were detected in 2018, including HAdV-B7 (n = 2), HAdV-C1 (n = 2), HAdV-B3 (n = 1), HAdV-  
207 B55 (n = 1) and HAdV-C2 (n = 1). No predominant strain was responsible for HAdV infections in  
208 2018, although HAdV-B7 (28.57%, 2/7) and HAdV-C1 (28.57%, 2/7) were the major causative  
209 genotypes.

210

211 **Fig. 2 Phylogenetic analyses based on partial hexon sequences of HAdV strains.** The trees

212 were generated using the neighbor-joining method, validated by 1000 bootstrap replicates.

213 Bootstrap values  $\geq 70\%$  are shown on the branch. HAdV sequences identified in this study are

214 indicated by closed circles.

215 **Fig. 3 Distribution of HAdV genotypes detected according to month.**

216

## 217 **Discussion**

218 SARI is one of the most common diseases in human and the leading cause of hospitalization in  
219 children worldwide[15, 16]. Because the early clinical symptoms of respiratory infections caused  
220 by viruses are similar, and the imaging findings lack specificity, pathogen detection is very  
221 important in clinical diagnosis and epidemiological monitoring. The present study was carried out  
222 from January 2017 to December 2019 among hospitalized patients with SARI in Huzhou, China.  
223 During the study period, a total of 657 hospitalized SARI cases were enrolled, of which 80.57%  
224 were children under 15 years of age. These results suggest that SARI is still an important factor  
225 affecting the health of local children. In total, 38.20% of hospitalized SARI cases in our study  
226 exhibited at least one respiratory virus, which was consistent with previous reports from China  
227 (33.44%-41.50%)[17, 18]and other countries (37.57%-41.8%)[19-21].

228 HAdV was the most common viral pathogen detected, with a detection rate of 7.08%, which is  
229 lower than the finding in SARI cases of hospitalized children in Beijing (11.90%) and Shanghai  
230 (14.70%)[22]. Previous studies have indicated that HAdV is the major pathogen that causes  
231 respiratory tract infections in children, especially for children younger than 5 years[8, 10]. As  
232 expected, we found that HAdV infection mainly occurred in children under 15 years of age  
233 (84.62%), and the detection rate reached a peak (9.44%) in children aged 2 to  $\leq 5$  years.

234 Most respiratory viral infections have seasonality, of note, this seasonality might vary according to  
235 geographical location. Price RHM *et al.* have investigated the relationship between meteorological

236 factors and viral seasonality in Scotland over a 6.5-year period[23]. In their study, HAdV is  
237 present throughout the year without a clear seasonality and prefer temperatures around 9 °C. In  
238 another study conducted in patients with respiratory infection in southern Brazil, HAdV circulated  
239 year - round, with higher frequency during winter and early spring[21]. Previous studies have  
240 shown that the epidemic peak seasons of HAdV-associated respiratory infections varies in  
241 different parts of China, and even in different monitoring years in the same region. Our study  
242 revealed that HAdV showed higher activity in the relatively high temperature seasons (spring to  
243 early autumn), which is similar to what has been found in Beijing (Northern China)[8] and  
244 Guangzhou (Southern China)[13], where HAdV infections occurred throughout the year with the  
245 highest prevalence in the summer. However, this finding is discordant with other studies  
246 conducted in Northern China that have reported seasonal peaks for HAdV infections in winter and  
247 spring[9, 12]. It is worth mentioning that the surveillance period of the above-mentioned studies  
248 conducted in different regions of China varies, and the predominant HAdV types circulated are  
249 also different. A recent study from Hunan indicates that different HAdV types showed a different  
250 seasonal distribution patterns: HAdV-3 was the predominant type of HAdV infection during  
251 summer, while HAdV-7 had the highest detection rate during spring[11]. Based on the above  
252 research, we speculate that the discrepant seasonal peak for HAdV infections are not only related  
253 to regional differences, but also related to the major types of HAdV circulating locally.

254 Globally the HAdV types most commonly associated with respiratory syndromes belong to HAdV  
255 species B, C or E. Many studies have reported that HAdV-B3, HAdV-B7 and HAdV-C2 are the  
256 most prevalent types in China, but the predominant type distribution vary among different regions  
257 and change over time. For example, most of HAdV-positive cases were caused by HAdV-B3 from  
258 2012 to 2013 in Southern China[13], while HAdV-B7 dominated in Northern China during the  
259 same study period[10]. However, recent reports indicated that the most predominant types have  
260 changed into HAdV-B3 and HAdV-C2 in some Northern cities of China in 2017-2018[8, 9].  
261 Throughout the present study period, seven different types of HAdV belonging to four species  
262 (HAdV-A, B, C, E) were identified in hospitalized SARI cases, with HAdV-B3 as the most  
263 prevalent HAdV types, followed by HAdV-B7 and HAdV-E4. Our monitoring data showed that  
264 no type of HAdV presented absolutely predominant during HAdV epidemic seasons, HAdV-B3  
265 was co-circulating with other types and presented an alternate prevalence pattern. Overall, HAdV-  
266 B3 was the most frequently detected genotype in 2017. No predominant strain was responsible for  
267 HAdV infections in 2018, with HAdV-B7 and HAdV-C1 as the major causative genotypes.  
268 HAdV-B3 re-emerged as the predominant genotype in 2019. Similar epidemic pattern were  
269 observed in a prolonged surveillance study conducted in southeastern China, where HAdV-7 and  
270 HAdV-3 alternate as the predominant genotypes causing pediatric pneumonia[24]. It is worth  
271 noting that in 2017 and 2019, when HAdV-3 presented as the predominant type detected, the  
272 detection rate of HAdV was significantly higher than that in 2018 (9.42% in 2017, 3.92% in 2018  
273 and 9.92% in 2019). The reasons need to be further explored. During HAdV infection,  
274 neutralizing antibodies are formed against the epitopes located in the hyper variable regions  
275 (HVRs) of the hexon protein. Just recently, Haque E et al. explored the variation in HVRs of  
276 hexon among globally distributed strains of HAdV-3[25]. They found that the HVRs of HAdV-3  
277 strains circulating worldwide were highly heterogeneous and have been mutating continuously  
278 since their original isolation and suggested that, this heterogeneity may explain the worldwide  
279 increased prevalence of HAdV-3 respiratory infections.

280 Recent HAdV epidemiology studies showed that there was very high co-infection rate between  
281 HAdV and other pathogens in respiratory tract infection cases (37.50%-74.85%)[8, 9, 11]. In our  
282 study, coinfection of HAdVs and other respiratory viruses was only detected in 13.46 % of the  
283 SARI cases. Such discrepant co-infection rate may be caused by the different selection criteria of  
284 the research objects and methodological differences.

285 Our study is limited by a single-site setting, small sample size, and especially the partial  
286 genotyping of detected HAdVs. Genotyping was only successful for 57.69% (30/52) of HAdV  
287 infection cases. Besides, typing of HAdV was merely performed by sequencing of partial hexon  
288 gene in the present study, which is hard to find any potential recombination between different  
289 types of HAdV strains.

## 290 **Conclusions**

291 In conclusion, this study revealed the prevalence and molecular epidemiological characteristics of  
292 HAdV infections among hospitalized patients with SARI in Huzhou from January 2017 to  
293 December 2019. HAdV was the second common viral pathogen detected in SARI cases, with most  
294 (84.62%) HAdV-positives cases detected among children < 15 years of age. Higher activity of  
295 HAdV infection could be seen in spring -early autumn season. As the most prevalent HAdV types,  
296 HAdV-B3 was co-circulating with other types and presented an alternate prevalence pattern. Our  
297 results provide a reliable scientific basis to better understand the role played by HAdVs in SARI  
298 cases, and for the prevention and control of HAdV infection.

### 299 **Authors' contributions**

300 LJ wrote the first draft and did the phylogenetic analysis. XFW and DSX participated in the  
301 HAdVs detection. LPC participated in the Genomic amplification for genotyping. GTL did the  
302 epidemiological investigation and performed the statistical analysis. All authors read and approved  
303 the final manuscript.

## 304 **Acknowledgements**

305 We thank the staff of the First People's Hospital in Huzhou for collecting the samples.

## 306 **References**

- 307
- 308 1. Hoeben RC, Uil TG. Adenovirus DNA replication. *Cold Spring Harb Perspect Biol.* 2013;5(3).
  - 309 2. Ghebremedhin B. Human adenovirus: Viral pathogen with increasing importance. *Eur J Microbiol*  
310 *Immunol.* 2014;4(1):26-33.
  - 311 3. Lynch JP, 3rd, Karon AE. Adenovirus: Epidemiology, Global Spread of Novel Serotypes, and  
312 *Advances in Treatment and Prevention. Semin Respir Crit Care Med.* 2016;37(4):586-602.
  - 313 4. Sandkovsky U, Vargas L, Florescu DF. Adenovirus: current epidemiology and emerging approaches  
314 *to prevention and treatment. Curr Infect Dis Rep.* 2014;16(8):014-0416.
  - 315 5. Lee J, Choi EH, Lee HJ. Comprehensive serotyping and epidemiology of human adenovirus  
316 *isolated from the respiratory tract of Korean children over 17 consecutive years (1991-2007). J Med*  
317 *Virol.* 2010;82(4):624-31.
  - 318 6. Lin MR, Yang SL, Gong YN, Kuo CC, Chiu CH, Chen CJ, et al. Clinical and molecular features of  
319 *adenovirus type 2, 3, and 7 infections in children in an outbreak in Taiwan, 2011. Clin Microbiol Infect.*  
320 *2017;23(2):110-6.*

- 321 7. Zhu Z, Zhang Y, Xu S, Yu P, Tian X, Wang L, et al. Outbreak of acute respiratory disease in China  
322 caused by B2 species of adenovirus type 11. *J Clin Microbiol.* 2009;47(3):697-703.
- 323 8. Yao LH, Wang C, Wei TL, Wang H, Ma FL, Zheng LS. Human adenovirus among hospitalized  
324 children with respiratory tract infections in Beijing, China, 2017-2018. *Viol J.* 2019;16(1):019-1185.
- 325 9. Zhao MC, Guo YH, Qiu FZ, Wang L, Yang S, Feng ZS, et al. Molecular and clinical characterization  
326 of human adenovirus associated with acute respiratory tract infection in hospitalized children. *J Clin*  
327 *Virol.* 2020;123(104254):25.
- 328 10. Liu C, Xiao Y, Zhang J, Ren L, Li J, Xie Z, et al. Adenovirus infection in children with acute lower  
329 respiratory tract infections in Beijing, China, 2007 to 2012. *BMC Infect Dis.* 2015;15(408):015-1126.
- 330 11. Xie L, Zhang B, Xiao N, Zhang F, Zhao X, Liu Q, et al. Epidemiology of human adenovirus infection  
331 in children hospitalized with lower respiratory tract infections in Hunan, China. *J Med Virol.*  
332 2019;91(3):392-400.
- 333 12. Li Y, Zhou W, Zhao Y, Wang Y, Xie Z, Lou Y, et al. Molecular typing and epidemiology profiles of  
334 human adenovirus infection among paediatric patients with severe acute respiratory infection in  
335 China. *PLoS One.* 2015;10(4).
- 336 13. Chen Y, Liu F, Wang C, Zhao M, Deng L, Zhong J, et al. Molecular Identification and  
337 Epidemiological Features of Human Adenoviruses Associated with Acute Respiratory Infections in  
338 Hospitalized Children in Southern China, 2012-2013. *PLoS One.* 2016;11(5).
- 339 14. Lu X, Erdman DD. Molecular typing of human adenoviruses by PCR and sequencing of a partial  
340 region of the hexon gene. *Arch Virol.* 2006;151(8):1587-602.
- 341 15. Williams BG, Gouws E, Boschi-Pinto C, Bryce J, Dye C. Estimates of world-wide distribution of  
342 child deaths from acute respiratory infections. *Lancet Infect Dis.* 2002;2(1):25-32.
- 343 16. Chakhunashvili G, Wagner AL, Power LE, Janusz CB, Machabishvili A, Karseladze I, et al. Severe  
344 Acute Respiratory Infection (SARI) sentinel surveillance in the country of Georgia, 2015-2017. *PLoS*  
345 *One.* 2018;13(7).
- 346 17. Zheng YX, Chen J, Kong DC, Pan H, Zhou YQ, Chen ML, et al. [Pathogenic characteristics of  
347 hospitalized severe acute respiratory infections in Shanghai, China, 2015-2017]. *Zhonghua Liu Xing*  
348 *Bing Xue Za Zhi.* 2019;40(8):911-6.
- 349 18. Xu W, Guo L, Dong X, Li X, Zhou P, Ni Q, et al. Detection of Viruses and *Mycoplasma pneumoniae*  
350 in Hospitalized Patients with Severe Acute Respiratory Infection in Northern China, 2015-2016. *Jpn J*  
351 *Infect Dis.* 2018;71(2):134-9.
- 352 19. Chittaganpitch M, Waicharoen S, Yingyong T, Praphasiri P, Sangkitporn S, Olsen SJ, et al. Viral  
353 etiologies of influenza-like illness and severe acute respiratory infections in Thailand. *Influenza Other*  
354 *Respir Viruses.* 2018;12(4):482-9.
- 355 20. Alroy KA, Do TT, Tran PD, Dang TQ, Vu LN, Le NTH, et al. Expanding severe acute respiratory  
356 infection (SARI) surveillance beyond influenza: The process and data from 1 year of implementation in  
357 Vietnam. *Influenza Other Respir Viruses.* 2018;12(5):632-42.
- 358 21. Pscheidt VM, Gregianini TS, Martins LG, Veiga A. Epidemiology of human adenovirus associated  
359 with respiratory infection in southern Brazil. *Reviews in medical virology.* 2021;31(4):e2189. Epub  
360 2020/11/07. doi: 10.1002/rmv.2189. PubMed PMID: 33156553.
- 361 22. Zhao Y, Lu R, Shen J, Xie Z, Liu G, Tan W. Comparison of viral and epidemiological profiles of  
362 hospitalized children with severe acute respiratory infection in Beijing and Shanghai, China. *BMC*  
363 *Infect Dis.* 2019;19(1):019-4385.
- 364 23. Price RHM, Graham C, Ramalingam S. Association between viral seasonality and meteorological



365 factors. Scientific reports. 2019;9(1):929. Epub 2019/02/01. doi: 10.1038/s41598-018-37481-y.  
366 PubMed PMID: 30700747; PubMed Central PMCID: PMC6353886.  
367 24. Wo Y, Lu QB, Huang DD, Li XK, Guo CT, Wang HY, et al. Epidemical features of HAdV-3 and HAdV-7  
368 in pediatric pneumonia in Chongqing, China. Arch Virol. 2015;160(3):633-8.  
369 25. Haque E, Banik U, Monowar T, Anthony L, Adhikary AK. Worldwide increased prevalence of  
370 human adenovirus type 3 (HAdV-3) respiratory infections is well correlated with heterogeneous  
371 hypervariable regions (HVRs) of hexon. PLoS One. 2018;13(3).  
372

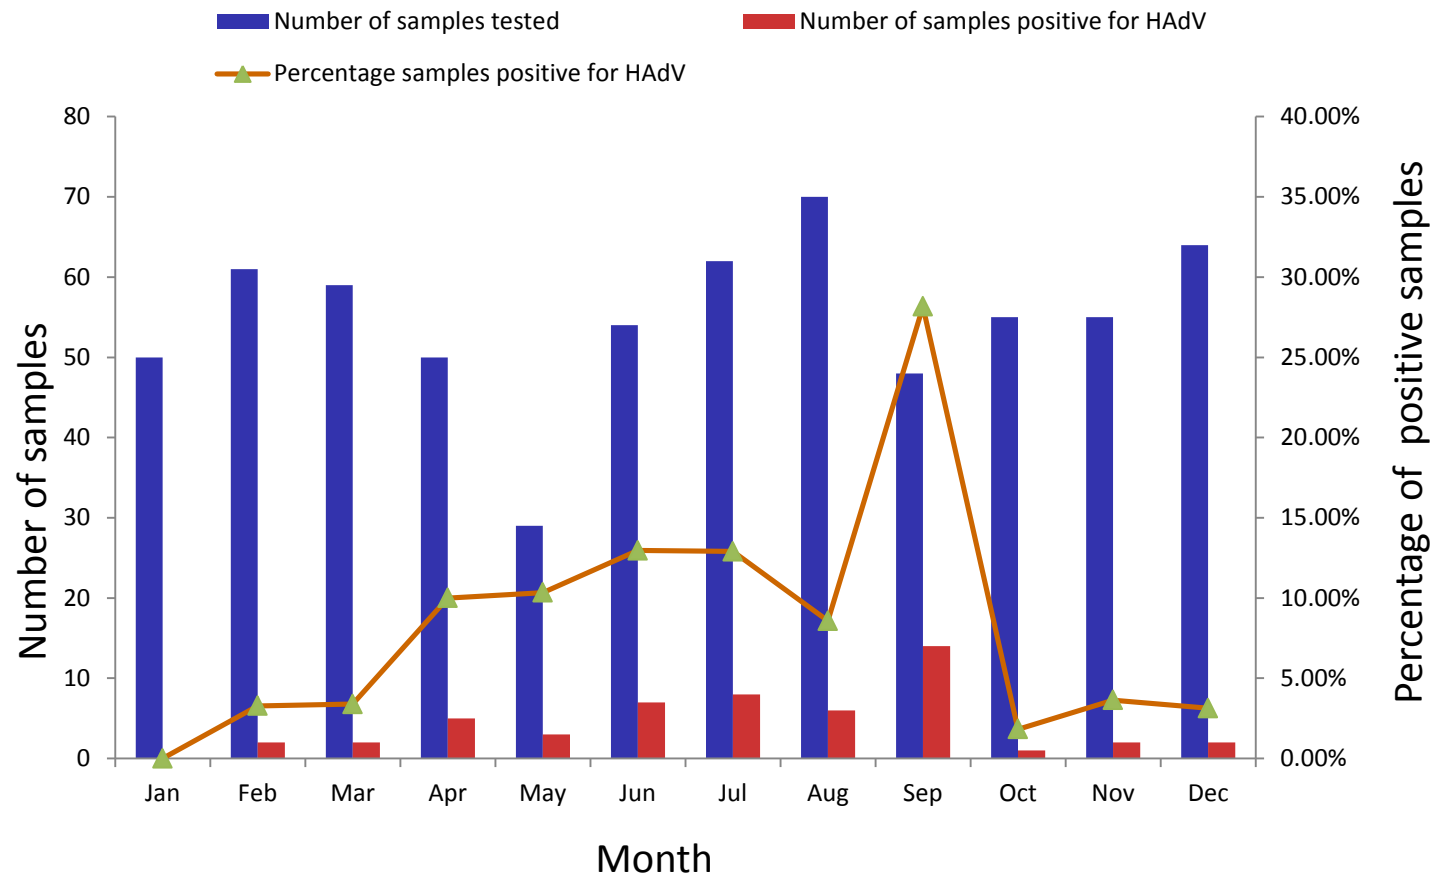

Figure2

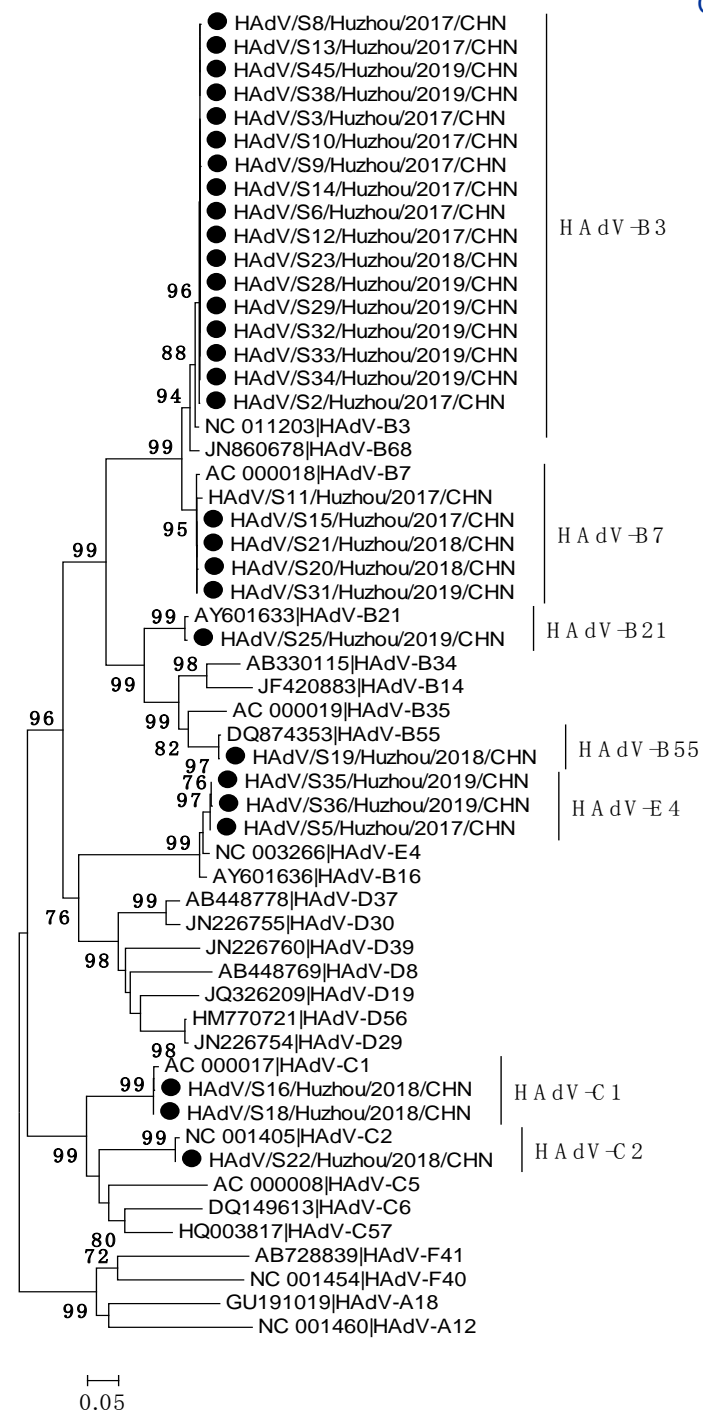

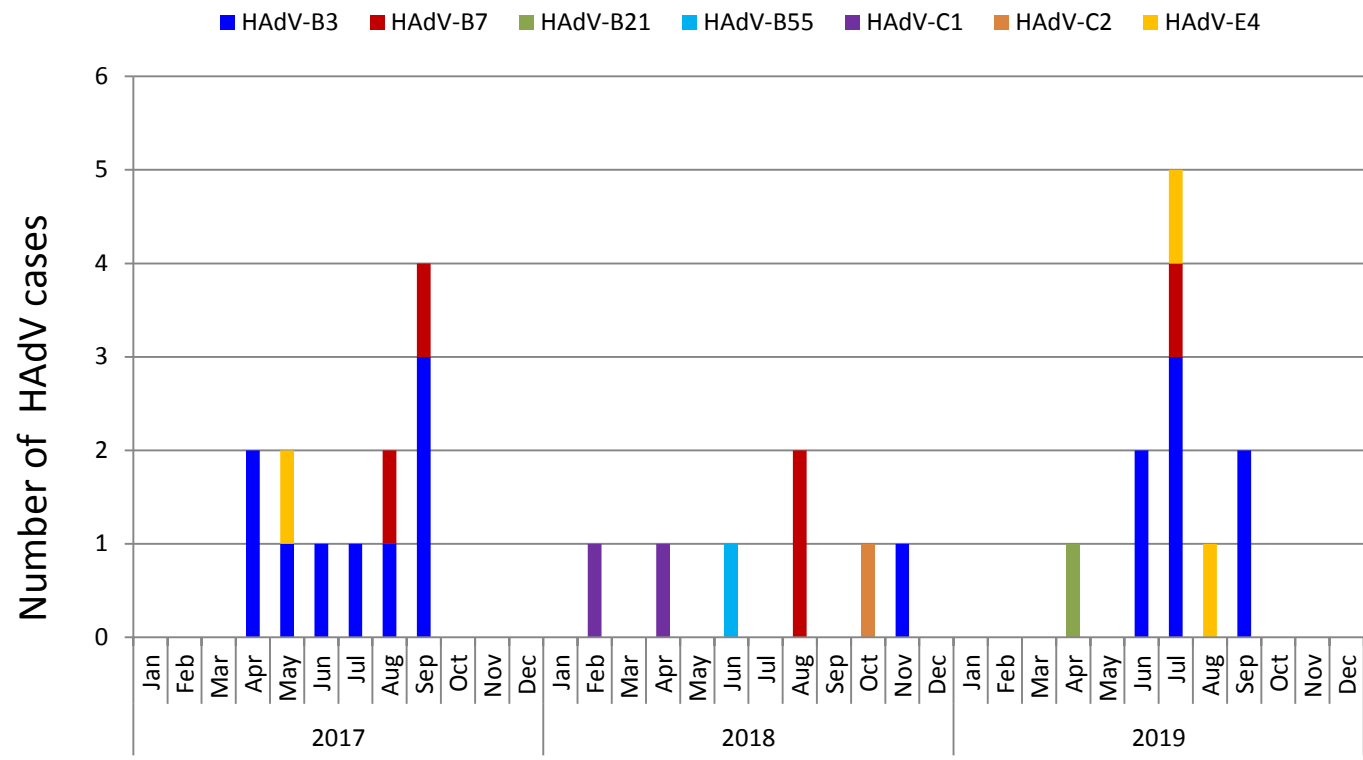

1  
2  
3  
4  
5  
6  
7  
8  
9  
10  
11  
12  
13  
14  
15  
16  
17  
18  
19  
20  
21  
22  
23  
24  
25  
26  
27  
28  
29  
30  
31  
32  
33  
34  
35  
36  
37  
38  
39  
40  
41  
42  
43  
44

Title:

Molecular Typing and Epidemiology Profiles of Human Adenovirus Infection among Hospitalized Patients with Severe Acute Respiratory Infection in Huzhou, China

Short title:

Human Adenovirus Infection in Hospitalized Patients in China

Deshun Xu, Liping Chen, Xiaofang Wu, Lei Ji

Author affiliations:

Huzhou Center for Disease Control and Prevention, Huzhou, Zhejiang Province, China

Email address:

Lei Ji: jileichn@163.com

Deshun Xu: xds666092@126.com

Liping Chen: lipingchen1106@hotmail.com

Xiaofang Wu: xf980718@126.com

\*Corresponding Author: Lei Ji

Email address: jileichn@163.com

## 45 Abstract

46 **Background:** Severe acute respiratory infections (SARI) threaten human health and cause a large  
47 number of hospitalized ~~patientations~~ every year. However, as one of the most common pathogen  
48 that cause acute respiratory tract infection, the molecular epidemiological information relating to  
49 human adenoviruses (HAdVs) among patients with SARI is limited. Here, we evaluate the  
50 epidemiological and molecular characteristics of HAdV infections among hospitalized patients  
51 with SARI from January 2017 to December 2019 in Huzhou, China.

52 **Methods:** From January 2017 to December 2019, a total of 657 nasopharyngeal swabs collected  
53 from inpatients with SARI were screened for HAdV and other common respiratory viruses by  
54 multiplex real-time PCR. All samples that tested positive for HAdV were further typed by  
55 sequencing partial sequences of hexon gene. Genotypes of HAdV were confirmed by phylogenetic  
56 analysis. Epidemiological data were analyzed using Microsoft Excel 2010 and service solutions  
57 (SPSS) 21.0 software.

58 **Results:** 251 (38.20%) samples were positive for at least one respiratory virus. HAdV was the  
59 second common viral pathogen detected, with a detection rate of 7.08%. Infection with HAdV was  
60 found in all age groups tested (~~0≤20~~, ~~2≤52~~, ~~5≤155~~, ~~15≤5015~~, ~~50≤6550~~, ~~≥~~  
61 ~~6565~~). Children under 15 years old accounted for 84.62% (44/52) of the infections. Higher  
62 activity of HAdV infection could be seen in spring-early autumn season. ~~7~~Seven different types  
63 of HAdV belonging to 4 species (HAdV-A, B, C, E) were identified in hospitalized SARI cases,  
64 with HAdV-B3 as the most prevalent HAdV types, followed by HAdV-B7 and HAdV-E4. HAdV-  
65 B3 was the most frequently detected genotype in 2017 and 2019, accounting for 75.00% (9/12)  
66 and 63.64% (7/11) of typed HAdV infections in 2017 and 2019, respectively. No predominant  
67 strain was responsible for HAdV infections in 2018, although HAdV-B7 (28.57%, 2/7) and  
68 HAdV-C1 (28.57%, 2/7) were the major causative genotypes.

69 **Conclusions:** This study revealed the prevalence and the molecular epidemiological  
70 characteristics of HAdV infections among hospitalized patients with SARI in Huzhou from  
71 January 2017 to December 2019. The HAdV prevalence is related to age and season. As the most  
72 prevalent HAdV types, HAdV-B3 was co-circulating with other types and presented an alternate  
73 prevalence pattern.

74 **Keywords:** Human adenovirus; Respiratory tract infection; Epidemiology

75

## 76 Background

77 Human adenoviruses (HAdVs) are non-enveloped, double-stranded DNA viruses belonging to the  
78 genus Mastadenovirus of the Adenoviridae family[1]. HAdVs have been recognized as pathogens  
79 that cause a broad spectrum of diseases, including respiratory illness, keratoconjunctivitis,  
80 gastroenteritis, cystitis and meningoencephalitis[2, 3]. They are associated with sporadic infection,  
81 as well as with community and institutional outbreaks. As a significant causative agent of  
82 respiratory tract illnesses, HAdV accounts for at least 5 to 10% of pediatric and 1 to 7% of adult  
83 respiratory tract infections (RTIs)[4, 5].

84 There are currently seven different HAdV species (HAdV-A through HAdV-G), and to date, 51  
85 serotypes and over 70 genotypes have been identified based on serology, phylogenetic analyses  
86 and whole genomic sequencing (<http://hadvvg.gmu.edu/>). Different types of HAdVs display

87 different tissue tropisms that correlate with clinical manifestations of infection. The HAdV types  
88 most commonly associated with respiratory infection belong to HAdV species B (HAdV-3,  
89 HAdV-7, HAdV-11, HAdV-14, HAdV-21), HAdV species C (HAdV-C1, -C2, -C5, and -C6) and  
90 HAdV species E (HAdV-4)[3].  
91 The predominant types of HAdV circulating at a given time differ among countries or regions and  
92 change over time. Replacement of dominant viruses by new strains may occur because  
93 transmission of novel strains between countries. -During the last decade, outbreaks of respiratory  
94 tract infections caused by novel HAdV strains have occurred frequently in many countries  
95 including China[6, 7]. Therefore, clarifying the genotype of HAdV currently circulating is  
96 essential for epidemiological surveillance and a better understanding of the epidemic pattern of  
97 HAdV infection. At present, China has not yet established a national HAdV surveillance system.  
98 Although data about HAdV associated with respiratory infection in China can be found in several  
99 studies, most studies are performed with specific groups, especially for children[8-13]. There is a  
100 lack of epidemiological analyses of HAdV associated respiratory infection among patients in all  
101 age groups in China. The aim of this study was to evaluate the epidemiological and molecular  
102 characteristics of HAdV infections among hospitalized patients with severe acute respiratory  
103 infection (SARI) from January 2017 to December 2019 in Huzhou, a medium-sized city located in  
104 eastern China.

105

## 106 **Materials and methods**

### 107 **Ethics statement**

108 This study was part of the national SARI surveillance program and was approved by the human  
109 research ethics committee of Huzhou Center for Disease Control and Prevention. The only human  
110 materials used were nasopharyngeal swabs collected from patients for routine detection. Data  
111 records and collected clinical specimens were deidentified and anonymous. Oral informed  
112 consents were obtained from each participant.

### 113 **Patients and specimens**

114 During the influenza A H1N1 epidemic in 2009, a surveillance system for SARI was established to  
115 monitor influenza infection ~~in these cases~~ in ~~china~~China. As local SARI surveillance sentinel  
116 hospital, the First People's Hospital of Huzhou was responsible for sample collection from  
117 ~~surveillance cases~~patients. The inclusion criteria for hospitalized SARI cases were as follows: the  
118 onset of the disease has a history of fever (> 38°C), accompanied by cough, and the onset does not  
119 exceed 10 days. Nasopharyngeal swabs were freshly collected and sent to Huzhou Center for  
120 Disease Control and Prevention for routine detection. All the specimens were stored at - 80 °C  
121 until further processing. Demographic and clinical data were obtained from the hospital's database.

### 122 **Detection of HAdV and other common respiratory viruses**

123 Total viral nucleic acids (DNA and RNA) were extracted from 200 µL of each specimen using  
124 TIANLONG Ex Viral DNA/RNA Kit (TIANLONG Biotech, Xi'an, China) according to the  
125 manufacturer's instructions. Multiplex real-time PCR kit (BioGerm, Shanghai, China) was used to  
126 detect HAdV and other common respiratory virus pathogens, including Human Influenza virus  
127 (HIFV), Human respiratory syncytial virus\_(HRSV), Human rhinovirus\_(HRV), Human  
128 bocavirus\_(HBOV), Human metapneumovirus\_(HMPV), Human Parainfluenza Virus\_(HPIV) type  
129 1-4 and Human coronavirus (HCoV). The qPCR cycling program was as follows: 50 °C for

130 10 min, 95 °C for 5min, followed by 40 cycles of 95 °C for 10 s, and 55 °C for 40 s. Samples with  
 131 a cycle threshold (Ct) < 35 were regarded as positive.

132 **HAdV genotyping**

133 HAdV-positive samples were further molecularly typed by nested PCR amplification and  
 134 sequencing of HAdV hexon gene hyper-variable regions 1–6 (HVR1–6) as described  
 135 previously[14]. Primer set AdhexF1 (nt 19135–19160; 5'-TICTTTGACATICGIGGIGTICTIGA-3')  
 136 and AdhexR1 (nt 20009–20030; 5'-CTGTACIACIGCCTGRTTCCACA-3') were used for first-  
 137 round amplification; a second-round PCR was performed using primer set AdhexF2 (nt 19165–  
 138 19187; 5'-GGYCCYAGYTTYAARCCCTAYTC-3') and AdhexR2 (nt 19960–19985; 5'-  
 139 GGTTCGTGTCICCCAGAGARTCIAGCA-3') if insufficient DNA was amplified from the first  
 140 reaction for sequencing. The PCR products were visualized by electrophoresis and sent to TaKaRa  
 141 Biotechnology (Dalian, China) for further purification and sequencing.

142 **Phylogenetic analysis**

143 Partial nucleotide sequences of hexon gene obtained in this study were compared with the NCBI  
 144 GenBank database (<http://www.ncbi.nlm.nih.gov>) by using online BLAST tools to preliminarily  
 145 determine the genotype. Multiple sequence alignment and phylogenetic analysis were conducted  
 146 using MEGA software version 6.06. The phylogenetic tree was generated using the neighbor-  
 147 joining method and bootstrap analysis was performed with 1000 replications.

148 **Statistical analysis**

149 Epidemiological data were analyzed using Microsoft Excel 2010 and service solutions (SPSS)  
 150 21.0 software. Statistical differences were determined using the Chi-square test and P-values  
 151 <0.05 were considered to represent a statistically significant difference.

152 **Accession numbers**

153 The partial hexon gene sequences obtained in this study have been deposited in GenBank under  
 154 the accession numbers MW594169-MW594198.

155

156 **Results**

157 **Characteristics of the SARI cases and the Viral infection profiles**

158 From January 2017 to December 2019, a total of 657 specimens (191 in 2017, 204 in 2018 and  
 159 262 in 2019) were collected from inpatients with SARI during the study period. ~~Among these~~  
 160 ~~SARI cases, of whom 361 (54.95%) were male and 296 (45.05%) were female, the~~The age  
 161 range was from 1 month to 86 years old with 590 (89.80%) cases ~~being individuals younger than~~  
 162 ~~15 years old, were children younger than 15 years old.~~

163 The viral infection profiles are shown in Table 1. Overall, 251 (38.20%) samples were positive for  
 164 at least one respiratory virus, the detection rate of respiratory virus was 45.54% (87/191) in 2017,  
 165 36.27% (74/204) in 2018 and 34.35% (90/262) in 2019. During the study period, the most  
 166 commonly detected viral pathogen in SARI cases was RSV, with a prevalence rate of 10.65%  
 167 (70/657), followed by HAdV (7.91%, 52/657) and HIFV (6.09%, 40/657). HMPV was detected in  
 168 30 patients (4.57%), HPIV was detected in 24 (3.65%), HBOV was detected in 21 (3.20%), HRV  
 169 was detected in 11 (1.67%), and HCoV was detected in 3 patients (0.46%).

170

171 **Table 1 Viral infection profiles in hospitalized patients with SARI in Huzhou, 2017–2019**

| Years | SARI cases | Any viral etiology | Viral infection profiles <u>N (%)</u> |     |      |      |      |      |     |
|-------|------------|--------------------|---------------------------------------|-----|------|------|------|------|-----|
|       |            |                    | HRS                                   | HAd | HIFV | HMPV | HPIV | HBOV | HRV |



|              |     |     | V                 | V                |                  |                  |                  |                  |                  | V               |
|--------------|-----|-----|-------------------|------------------|------------------|------------------|------------------|------------------|------------------|-----------------|
| 2017         | 191 | 87  | 32<br>(16.7<br>5) | 18<br>(9.42<br>) | 8<br>(4.19<br>)  | 8<br>(4.19<br>)  | 10<br>(5.24<br>) | 8<br>(4.19<br>)  | 3<br>(1.57<br>)  | 0<br>(0.00<br>) |
| 2018         | 204 | 74  | 17<br>(8.33<br>)  | 8<br>(3.92<br>)  | 21<br>(10.2<br>) | 14<br>(6.86<br>) | 5<br>(2.45<br>)  | 7<br>(3.43<br>)  | 2<br>(0.98<br>)  | 0<br>(0.00<br>) |
| 2019         | 262 | 90  | 21<br>(8.02<br>)  | 26<br>(9.92<br>) | 11<br>(4.20<br>) | 8<br>(3.05<br>)  | 9<br>(3.44<br>)  | 6<br>(2.29<br>)  | 6<br>(2.29<br>)  | 3<br>(1.15<br>) |
| <b>Total</b> | 657 | 251 | 70<br>(10.6<br>5) | 52<br>(7.91<br>) | 40<br>(6.09<br>) | 30<br>(4.57<br>) | 24<br>(3.65<br>) | 21<br>(3.20<br>) | 11<br>(1.67<br>) | 3<br>(0.46<br>) |

172

### 173 Epidemiology of HAdV

174 ~~During our study period, HAdV was the second common viral pathogen detected in SARI cases,~~  
175 ~~with a detection rate of 7.91% (52/657). As shown in Table 2, among the 52 HAdV-infected~~  
176 ~~patients, 31 (58.33%) were male and 21 (41.67%) were female (Table 2). No significant difference~~  
177 ~~was observed in males and females in the HAdV-infected cases (P = 0.481). Infection with HAdV~~  
178 ~~was found in all age groups tested (0 ≤ 2, 2 ≤ 5, 5 ≤ 15, 15 ≤ 50, 50 ≤ 65, ≥ 65, 2, 5, 15,~~  
179 ~~50, 65). Children under 15 years old accounted for 84.62% (44/52) of the infections. There~~  
180 ~~were no significant differences in HAdV detection rates among different age groups (P = 0.467).~~  
181 ~~The highest detection rate was in the 2–<5 year age group (9.44%), followed by 5–<15 years~~  
182 ~~(9.13%), 15–<50 years (7.14%), 0–<2 years (5.05%), 50–<65 years (3.13%) and ≥65 years~~  
183 ~~(2.86%).~~

184 **Table 2 HAdV-positive in hospitalized patients of different ages and gender with SARI**

| Variable           | Tested cases<br>N (percentage) | SARI cases<br>N (percentage) | HAdV-positive cases<br>N (percentage) | HAdV-negative cases<br>N (percentage) | Positive rate | $\chi^2$ | P     |
|--------------------|--------------------------------|------------------------------|---------------------------------------|---------------------------------------|---------------|----------|-------|
| <b>Gender</b>      |                                |                              |                                       |                                       |               | 0.497    | 0.481 |
| Male               | 361 (53.40)                    |                              | 31 (58.33)                            | 330(54.55)                            | 8.59%         |          |       |
| Female             | 296 (46.60)                    |                              | 21 (41.67)                            | 275(45.45)                            | 7.09%         |          |       |
| <b>Age (years)</b> |                                |                              |                                       |                                       |               | 0.431    | 0.476 |
| 0 ≤ 2              | 99 (15.07)                     |                              | 5 (9.62)                              | 94 (16.55)                            | 5.05%         |          |       |
| 2 ≤ 5              | 180 (27.40)                    |                              | 17 (32.69)                            | 163 (23.51)                           | 9.44%         |          |       |
| 5 ≤ 15             | 241 (36.68)                    |                              | 22 (42.31)                            | 219 (43.05)                           | 9.13%         |          |       |
| 15 ≤ 50            | 70 (10.65)                     |                              | 5 (9.61)                              | 65 (6.95)                             | 7.14%         |          |       |
| 50 ≤ 65            | 32 (4.87)                      |                              | 1 (1.92)                              | 31 (4.64)                             | 3.13%         |          |       |
| 65 ≤ 65            | 35 (5.33)                      |                              | 1 (1.92)                              | 34 (5.30)                             | 2.86%         |          |       |
| <b>Total</b>       | 657                            |                              | 52                                    | 605                                   | 7.91%         |          |       |

185

186 **Fig. 1 Monthly distribution of HAdV infections from January 2017 to December 2019**

187

188 HAdV detection rate varied from year to year, from 9.42% (18/191) in 2017, 3.92% (8/204) in  
189 2018 to 9.92% (26/262) in 2019 (Table 1). The monthly distribution of HAdV infections is shown  
190 in Fig. 1. HAdV was detected in every month throughout the study period except January. Higher

191 activity of HAdV infection could be seen from spring to early autumn (April to September), and  
192 the detection rate in September reached a peak of 28.17%. In contrast, lower activity of HAdV  
193 infection were observed during late autumn to winter (from October to February), when the  
194 average detection rate was only 2.37%.

195 Additionally, 13.46% (n = 7) of the 52 HAdV-infected cases were co-detected with other  
196 respiratory pathogens. RSV (n = 3) was the most frequently co-detected virus. HPIV (n = 2),  
197 HMPV (n = 1) and HRV (n = 1) were also found to be co-infected with HAdV.

#### 198 **HAdV genotyping and phylogenetic analysis**

199 Of the 52 HAdV-positive samples confirmed by real-time RT-PCR, 30 samples were successfully  
200 sequenced and genotyped by nested-PCR. Phylogenetic analysis based on partial hexon sequences  
201 indicated that 4 species (A, B, C, E) of HAdV, including 7 different types were identified  
202 throughout the study period (Fig. 2); see Fig. 2. HAdV-B3 (n = 17, 56.67 %) was the most  
203 prevalent HAdV types, followed by HAdV-B7 (n = 5, ~~16.367~~ 16.67 %) and HAdV-E4 (n = 3,  
204 10.00 %). HAdV-C1 (n = 2, 6.67 %), HAdV-C2 (n = 1, 3.33 %), HAdV-B21 (n = 1, 3.33 %) and  
205 HAdV-B55 (n = 1, 3.33 %) were also detected. The genotype distribution of HAdV infections in  
206 each month is shown in Fig. 3. The predominant genotypes of HAdV during our study period  
207 varied according to surveillance year. Overall, HAdV-B3 was the most frequently detected  
208 genotype in 2017 and 2019, accounting for 75.00% (9/12) and 63.64 (7/11) of typed HAdV  
209 infections ~~in 2017 and 2019~~, respectively. ~~5-Five~~ Five different types were detected in 2018, including  
210 HAdV-B7 (n = 2), HAdV-C1 (n = 2), HAdV-B3 (n = 1), HAdV-B55 (n = 1) and HAdV-C2 (n = 1).  
211 No predominant strain was responsible for HAdV infections in 2018, although HAdV-B7 (28.57%,  
212 2/7) and HAdV-C1 (28.57%, 2/7) were the major causative genotypes.

213

214 **Fig. 2 Phylogenetic analyses based on partial hexon sequences of HAdV strains.** The trees  
215 were generated using the neighbor-joining method, validated by 1000 bootstrap replicates.  
216 Bootstrap values  $\geq 70\%$  are shown on the branch. HAdV sequences identified in this study are  
217 indicated by closed circles.

218 **Fig. 3 Distribution of HAdV genotypes detected according to month.**

219

## 220 **Discussion**

221 SARI is one of the most common diseases in human and the leading cause of hospitalization in  
222 children worldwide[15, 16]. Because the early clinical symptoms of respiratory infections caused  
223 by viruses are similar, and the imaging findings lack specificity, pathogen detection is very  
224 important in clinical diagnosis and epidemiological monitoring. The present study was carried out  
225 from January 2017 to December 2019 among hospitalized patients with SARI in Huzhou, China.  
226 During the study period, a total of 657 hospitalized SARI cases were enrolled, of which 80.57%  
227 were children under 15 years of age. ~~These results#~~ suggests that SARI is still an important factor  
228 affecting the health of local children. ~~In total,~~ 38.20% of hospitalized SARI cases in our study  
229 exhibited at least one respiratory virus, which was consistent with previous reports from China  
230 (33.44%-41.50%)[17, 18]and other countries (37.57%-41.8%)[19-21].

231 HAdV was the ~~second-most~~ common viral pathogen detected, with a detection rate of 7.08%,  
232 which is lower than the finding in SARI cases of hospitalized children in Beijing (11.90%) and  
233 Shanghai (14.70%)[22]. Previous studies have indicated that HAdV is the major pathogen that

234 causes respiratory tract infections in children, especially for children younger than 5 years[8, 10].  
235 As expected, we found that HAdV infection mainly occurred in children under 15 years of age  
236 (84.62%), and the detection rate reached a peak (9.44%) in children aged 2 to <5 years.

237 Most respiratory viral infections have seasonality, of note, this seasonality might vary according to  
238 geographical location. Price RHM *et al.* have investigated the relationship between meteorological  
239 factors and viral seasonality in Scotland over a 6.5-year period[23]. In their study, HAdV is  
240 present throughout the year without a clear seasonality and prefer temperatures around 9 °C. In  
241 another study conducted in patients with respiratory infection in southern Brazil, HAdV circulated  
242 year - round, with higher frequency during winter and early spring[21]. Previous studies have  
243 shown that the epidemic peak seasons of HAdV-associated respiratory infections varies in  
244 different parts of China, and even in different monitoring years in the same region. Our study  
245 revealed that HAdV showed higher activity in the relatively high temperature seasons (spring to  
246 early autumn), which is similar to what has been found in Beijing (Northern China)[8] and  
247 Guangzhou (Southern China)[13], where HAdV infections occurred throughout the year with the  
248 highest prevalence in the summer. However, this finding is discordant with other studies  
249 conducted in Northern China that have reported seasonal peaks for HAdV infections in winter and  
250 spring[9, 12]. It is worth mentioning that the surveillance period of the above-mentioned studies  
251 conducted in different regions of China varies, and the predominant HAdV types circulated are  
252 also different. A recent study from Hunan indicates that different HAdV types showed a different  
253 seasonal distribution patterns: HAdV-3 was the predominant type of HAdV infection during  
254 summer, while HAdV-7 had the highest detection rate during spring[11]. Based on the above  
255 research, we speculate that the discrepant seasonal peak for HAdV infections are not only related  
256 to regional differences, but also related to the major types of HAdV circulating locally.

257 Globally the HAdV types most commonly associated with respiratory syndromes belong to HAdV  
258 species B, C or E. Many studies have reported that HAdV-B3, HAdV-B7 and HAdV-C2 are the  
259 most prevalent types in China, but the predominant type distribution vary among different regions  
260 and change over time. For example, most of HAdV-positive cases were caused by HAdV-B3 from  
261 2012 to 2013 in Southern China[13], while HAdV-B7 dominated in Northern China during the  
262 same study period[10]. However, recent reports indicated that the most predominant types have  
263 changed into HAdV-B3 and HAdV-C2 in some Northern cities of China in 2017-2018[8, 9].  
264 Throughout the present study period, ~~7-seven~~ different types of HAdV belonging to ~~4-four~~ species  
265 (HAdV-A, B, C, E) were identified in hospitalized SARI cases, with HAdV-B3 as the most  
266 prevalent HAdV types, followed by HAdV-B7 and HAdV-E4. Our monitoring data showed that no  
267 type of HAdV presented absolutely predominant during HAdV epidemic seasons, HAdV-B3 was  
268 co-circulating with other types and presented an alternate prevalence pattern. Overall, HAdV-B3  
269 was the most frequently detected genotype in 2017. No predominant strain was responsible for  
270 HAdV infections in 2018, with HAdV-B7 and HAdV-C1 as the major causative genotypes.  
271 HAdV-B3 re-emerged as the predominant genotype in 2019. Similar epidemic pattern were  
272 observed in a prolonged surveillance study conducted in southeastern China, where HAdV-7 and  
273 HAdV-3 alternate as the predominant genotypes causing pediatric pneumonia[24]. It is worth  
274 noting that in 2017 and 2019, when HAdV-3 presented as the predominant type detected, the  
275 ~~detected-detection~~ rate of HAdV was significantly higher than that in ~~2017~~2018 (9.42% in 2017,  
276 3.92% in 2018 and 9.92% in 2019). The reasons need to be further explored. During HAdV  
277 infection, neutralizing antibodies are formed against the epitopes located in the hyper variable

Formatted: Font: Italic

278 regions (HVRs) of the hexon protein. Just recently, Haque E et al. explored the variation in HVRs  
279 of hexon among globally distributed strains of HAdV-3[25]. They found that the HVRs of HAdV-  
280 3 strains circulating worldwide were highly heterogeneous and have been mutating continuously  
281 since their original isolation and suggested that, this heterogeneity may explain the worldwide  
282 increased prevalence of HAdV-3 respiratory infections.

283 Recent HAdV epidemiology studies showed that there was very high co-infection rate between  
284 HAdV and other pathogens in respiratory tract infection cases (37.50%-74.85%)[8, 9, 11]. In our  
285 study, coinfection of HAdVs and other respiratory viruses was only detected in 13.46 % of the  
286 SARI cases. Such discrepant co-infection rate may be caused by the different selection criteria of  
287 the research objects and methodological differences.

288 Our study is limited by a single-site setting, small sample size, and especially the partial  
289 genotyping of detected HAdVs. Genotyping was only successful for 57.69% (30/52) of HAdV  
290 infection cases. Besides, typing of HAdV was merely performed by sequencing of partial hexon  
291 gene in the present study, which is hard to find any potential recombination between different  
292 types of HAdV strains.

## 293 Conclusions

294 In conclusion, this study revealed the prevalence and molecular epidemiological characteristics of  
295 HAdV infections among hospitalized patients with SARI in Huzhou from January 2017 to  
296 December 2019. HAdV was the second common viral pathogen detected in SARI cases, with most  
297 (84.62%) HAdV-positives cases detected among children < 15 years of age. Higher activity of  
298 HAdV infection could be seen in spring -early autumn season. ~~As the most prevalent HAdV types,~~  
299 ~~HAdV-B3 was co-circulating with other types and presented an alternate prevalence pattern.No~~  
300 ~~type of HAdV presented absolutely predominant during HAdV epidemic seasons, HAdV B3 was~~  
301 ~~co-circulating with other types and presented an alternate prevalence pattern.~~ Our results provide a  
302 reliable scientific basis to better understand the role played by HAdVs in SARI cases, and for the  
303 prevention and control of HAdV infection.

### 304 Authors' contributions

305 LJ wrote the first draft and did the phylogenetic analysis. XFW and DSX participated in the  
306 HAdVs detection. LPC participated in the Genomic amplification for genotyping. GTL did the  
307 epidemiological investigation and performed the statistical analysis. All authors read and approved  
308 the final manuscript.

## 309 Acknowledgements

310 We thank the staff of the First People's Hospital in Huzhou for collecting the samples.

## 311 References

- 312
- 313 1. Hoeben RC, Uil TG. Adenovirus DNA replication. Cold Spring Harb Perspect Biol. 2013;5(3).
  - 314 2. Ghebremedhin B. Human adenovirus: Viral pathogen with increasing importance. Eur J Microbiol  
315 Immunol. 2014;4(1):26-33.
  - 316 3. Lynch JP, 3rd, Kajon AE. Adenovirus: Epidemiology, Global Spread of Novel Serotypes, and  
317 Advances in Treatment and Prevention. Semin Respir Crit Care Med. 2016;37(4):586-602.
  - 318 4. Sandkovsky U, Vargas L, Florescu DF. Adenovirus: current epidemiology and emerging approaches

319 to prevention and treatment. *Curr Infect Dis Rep.* 2014;16(8):014-0416.

320 5. Lee J, Choi EH, Lee HJ. Comprehensive serotyping and epidemiology of human adenovirus  
321 isolated from the respiratory tract of Korean children over 17 consecutive years (1991-2007). *J Med*  
322 *Virol.* 2010;82(4):624-31.

323 6. Lin MR, Yang SL, Gong YN, Kuo CC, Chiu CH, Chen CJ, et al. Clinical and molecular features of  
324 adenovirus type 2, 3, and 7 infections in children in an outbreak in Taiwan, 2011. *Clin Microbiol Infect.*  
325 2017;23(2):110-6.

326 7. Zhu Z, Zhang Y, Xu S, Yu P, Tian X, Wang L, et al. Outbreak of acute respiratory disease in China  
327 caused by B2 species of adenovirus type 11. *J Clin Microbiol.* 2009;47(3):697-703.

328 8. Yao LH, Wang C, Wei TL, Wang H, Ma FL, Zheng LS. Human adenovirus among hospitalized  
329 children with respiratory tract infections in Beijing, China, 2017-2018. *Viol J.* 2019;16(1):019-1185.

330 9. Zhao MC, Guo YH, Qiu FZ, Wang L, Yang S, Feng ZS, et al. Molecular and clinical characterization  
331 of human adenovirus associated with acute respiratory tract infection in hospitalized children. *J Clin*  
332 *Virol.* 2020;123(104254):25.

333 10. Liu C, Xiao Y, Zhang J, Ren L, Li J, Xie Z, et al. Adenovirus infection in children with acute lower  
334 respiratory tract infections in Beijing, China, 2007 to 2012. *BMC Infect Dis.* 2015;15(408):015-1126.

335 11. Xie L, Zhang B, Xiao N, Zhang F, Zhao X, Liu Q, et al. Epidemiology of human adenovirus infection  
336 in children hospitalized with lower respiratory tract infections in Hunan, China. *J Med Virol.*  
337 2019;91(3):392-400.

338 12. Li Y, Zhou W, Zhao Y, Wang Y, Xie Z, Lou Y, et al. Molecular typing and epidemiology profiles of  
339 human adenovirus infection among paediatric patients with severe acute respiratory infection in  
340 China. *PLoS One.* 2015;10(4).

341 13. Chen Y, Liu F, Wang C, Zhao M, Deng L, Zhong J, et al. Molecular Identification and  
342 Epidemiological Features of Human Adenoviruses Associated with Acute Respiratory Infections in  
343 Hospitalized Children in Southern China, 2012-2013. *PLoS One.* 2016;11(5).

344 14. Lu X, Erdman DD. Molecular typing of human adenoviruses by PCR and sequencing of a partial  
345 region of the hexon gene. *Arch Virol.* 2006;151(8):1587-602.

346 15. Williams BG, Gouws E, Boschi-Pinto C, Bryce J, Dye C. Estimates of world-wide distribution of  
347 child deaths from acute respiratory infections. *Lancet Infect Dis.* 2002;2(1):25-32.

348 16. Chakhunashvili G, Wagner AL, Power LE, Janusz CB, Machabishvili A, Karseladze I, et al. Severe  
349 Acute Respiratory Infection (SARI) sentinel surveillance in the country of Georgia, 2015-2017. *PLoS*  
350 *One.* 2018;13(7).

351 17. Zheng YX, Chen J, Kong DC, Pan H, Zhou YQ, Chen ML, et al. [Pathogenic characteristics of  
352 hospitalized severe acute respiratory infections in Shanghai, China, 2015-2017]. *Zhonghua Liu Xing*  
353 *Bing Xue Za Zhi.* 2019;40(8):911-6.

354 18. Xu W, Guo L, Dong X, Li X, Zhou P, Ni Q, et al. Detection of Viruses and *Mycoplasma pneumoniae*  
355 in Hospitalized Patients with Severe Acute Respiratory Infection in Northern China, 2015-2016. *Jpn J*  
356 *Infect Dis.* 2018;71(2):134-9.

357 19. Chittaganpitch M, Waicharoen S, Yingyong T, Praphasiri P, Sangkitporn S, Olsen SJ, et al. Viral  
358 etiologies of influenza-like illness and severe acute respiratory infections in Thailand. *Influenza Other*  
359 *Respir Viruses.* 2018;12(4):482-9.

360 20. Alroy KA, Do TT, Tran PD, Dang TQ, Vu LN, Le NTH, et al. Expanding severe acute respiratory  
361 infection (SARI) surveillance beyond influenza: The process and data from 1 year of implementation in  
362 Vietnam. *Influenza Other Respir Viruses.* 2018;12(5):632-42.

- 363 21. Pscheidt VM, Gregianini TS, Martins LG, Veiga A. Epidemiology of human adenovirus associated  
364 with respiratory infection in southern Brazil. *Reviews in medical virology*. 2021;31(4):e2189. Epub  
365 2020/11/07. doi: 10.1002/rmv.2189. PubMed PMID: 33156553.
- 366 22. Zhao Y, Lu R, Shen J, Xie Z, Liu G, Tan W. Comparison of viral and epidemiological profiles of  
367 hospitalized children with severe acute respiratory infection in Beijing and Shanghai, China. *BMC*  
368 *Infect Dis*. 2019;19(1):019-4385.
- 369 23. Price RHM, Graham C, Ramalingam S. Association between viral seasonality and meteorological  
370 factors. *Scientific reports*. 2019;9(1):929. Epub 2019/02/01. doi: 10.1038/s41598-018-37481-y.  
371 PubMed PMID: 30700747; PubMed Central PMCID: PMC6353886.
- 372 24. Wo Y, Lu QB, Huang DD, Li XK, Guo CT, Wang HY, et al. Epidemical features of HAdV-3 and HAdV-7  
373 in pediatric pneumonia in Chongqing, China. *Arch Virol*. 2015;160(3):633-8.
- 374 25. Haque E, Banik U, Monowar T, Anthony L, Adhikary AK. Worldwide increased prevalence of  
375 human adenovirus type 3 (HAdV-3) respiratory infections is well correlated with heterogeneous  
376 hypervariable regions (HVRs) of hexon. *PLoS One*. 2018;13(3).
- 377

## Rebuttal letter

Dear Editor Rosa Maria Wong-Chew,

Thank you very much for giving us an opportunity to revise our manuscript. We also appreciate reviewers very much for their positive and constructive comments and suggestions on our manuscript entitled “Molecular Typing and Epidemiology Profiles of Human Adenovirus Infection among Hospitalized Patients with Severe Acute Respiratory Infection in Huzhou, China” (PONE-D-21-05692).

We have carefully addressed all of the comments from the reviewers, as outlined in the point-by-point responses attached below. We hope that you find the revised manuscript now acceptable for publication in PLOS ONE.

Updated statement: This work was supported by grants from Natural Science Foundation of Huzhou Science and Technology Bureau (grant number: 2021YZ23), the funders had no role in study design, data collection and analysis, decision to publish, or preparation of the manuscript.

Yours Sincerely

Lei Ji

### Responses to the reviewers' comments:

(Q as comments, A as our responses)

#### Reviewer 1

**Q:** Considering that HAdV is an important respiratory virus worldwide, I suggest discussing the findings of the study with studies performed in other countries, such as in Europe (Price RHM et al., <https://doi.org/10.1038/s41598-018-37481-y>) and South America (Pscheidt et al., DOI: 10.1002/rmv.2189). When discussing HAdV seasonality, I suggest comparing the study with those from other geographic regions, as viral circulation has been associated with temperature and circulation of other respiratory viruses.

**A:** Thanks for the reviewer's suggestion. The two references mentioned above have been added (see line 230, 239,242). “Most respiratory viral infections have seasonality, of note, this seasonality might vary according to geographical location. Price RHM et al. have investigated the relationship between meteorological factors and viral seasonality in Scotland over a 6.5-year period. In their study, HAdV is present throughout the year without a clear seasonality and prefer temperatures around 9 ° C. In another study conducted in patients with respiratory infection in southern Brazil, HAdV circulated year - round, with higher frequency during winter and early spring.” We have added these sentences to the manuscript, see line 238-245.

**Q:** There are several English and typing details that should be revised and corrected, as pointed in the pdf file. For example, symbols such as ~ to describe age group (0~, 2~, 5~,15~, 50~, 65~) does not make much sense. Please use  $0 \leq 2$ ;  $2 \leq 5$ ;  $5 \leq 15$ , etc.

**A:** Thanks for the reviewer's suggestion. Corrections have been made in the revised version.

**Q:** In the methodology, I believe there is a step missing in the PCR description. Isn't there an

extension step at 72°C after the annealing step?

**A:** According to the multiplex real-time PCR kit's instructions, the qPCR cycling program was as 50 °C for 10 min, 95 °C for 5min, followed by 40 cycles of 95 °C for 10 s, and 55 °C for 40 s. The same temperature (55 °C) is used for the annealing and extension steps.

**Q:** In Table 1, I suggest including the percentage in addition to the number of cases – N (%).

In Table 2, use Sex instead of Gender.

**A:** Thanks for the reviewer's suggestion. Corrections have been made in the revised version .

**Q:** Other comments and suggestions can be found in the pdf file (attached).

**A:** Thanks. Corrections have been made in the revised version according to comments and suggestions in the pdf file.

## **Reviewer 2**

**Q:** I have only one comment: The authors were unable to type up to 42.3% (22/52) of the study samples. What could explain this high failure rate.

**A:** Thanks for the reviewer's suggestion. Since the sensitivity of ordinary RT-PCR is lower than that of real-time RT-PCR, more accurate genotyping was only possible for 57.7% (30/52) of the HAdV-positive samples confirmed by real-time RT-PCR, the remaining 22 samples with most of them got a cycle threshold (Ct)  $\geq 30$  were failed to genotyped.
